# Supplementary material for: Health insurance awareness and its uptake in India: a systematic review protocol
Source: PubMed Central journal article supplement — BMJ Open. 2021 Apr 15;11(4):e043122. doi: 10.1136/bmjopen-2020-043122 (PMC8054078; doi:10.1136/bmjopen-2020-043122), 2021-04-15
Supplement: bmjopen-2020-043122.draft_revisions.pdf [file bmjopen-2020-043122.draft_revisions.pdf]

# BMJ Open

BMJ Open is committed to open peer review. As part of this commitment we make the peer review history of every article we publish publicly available.

When an article is published we post the peer reviewers' comments and the authors' responses online. We also post the versions of the paper that were used during peer review. These are the versions that the peer review comments apply to.

The versions of the paper that follow are the versions that were submitted during the peer review process. They are not the versions of record or the final published versions. They should not be cited or distributed as the published version of this manuscript.

BMJ Open is an open access journal and the full, final, typeset and author-corrected version of record of the manuscript is available on our site with no access controls, subscription charges or pay-per-view fees (<http://bmjopen.bmj.com>).

If you have any questions on BMJ Open's open peer review process please email [info.bmjopen@bmj.com](mailto:info.bmjopen@bmj.com)

# BMJ Open

## Health insurance awareness and utilization of healthcare services in India: A rapid review synthesis protocol

|                               |                                                                                                                                                                                                                                                                                                                                                                                                                                                                                                                                                                                                                                                                                                                                                                                                                                                                             |
|-------------------------------|-----------------------------------------------------------------------------------------------------------------------------------------------------------------------------------------------------------------------------------------------------------------------------------------------------------------------------------------------------------------------------------------------------------------------------------------------------------------------------------------------------------------------------------------------------------------------------------------------------------------------------------------------------------------------------------------------------------------------------------------------------------------------------------------------------------------------------------------------------------------------------|
| Journal:                      | <i>BMJ Open</i>                                                                                                                                                                                                                                                                                                                                                                                                                                                                                                                                                                                                                                                                                                                                                                                                                                                             |
| Manuscript ID                 | bmjopen-2020-043122                                                                                                                                                                                                                                                                                                                                                                                                                                                                                                                                                                                                                                                                                                                                                                                                                                                         |
| Article Type:                 | Protocol                                                                                                                                                                                                                                                                                                                                                                                                                                                                                                                                                                                                                                                                                                                                                                                                                                                                    |
| Date Submitted by the Author: | 31-Aug-2020                                                                                                                                                                                                                                                                                                                                                                                                                                                                                                                                                                                                                                                                                                                                                                                                                                                                 |
| Complete List of Authors:     | B, Reshmi; Manipal Academy of Higher Education, Health Information Management, Manipal College of Health Professionals<br>Unnikrishnan, B.; Manipal Academy of Higher Education, Community Medicine, Kasturba Medical College<br>Parsekar, Shradha; Manipal Academy of Higher Education, Public Health Evidence South Asia, Department of Health Information, Prasanna School of Public Health (PSPH), Manipal Academy of Higher Education<br>Rajwar, Eti; Manipal Academy of Higher Education, Public Health Evidence South Asia, Department of health informatics, Prasanna School of Public Health,<br>Vijayamma, Ratheebhai; Manipal Academy of Higher Education, Manipal Institute of Communication<br>VENKATESH, BHUMIKA; Manipal Academy of Higher Education, Public Health Evidence South Asia, Department of health informatics, Prasanna School of Public Health, |
| Keywords:                     | Health economics < HEALTH SERVICES ADMINISTRATION & MANAGEMENT, Health policy < HEALTH SERVICES ADMINISTRATION & MANAGEMENT, Public health < INFECTIOUS DISEASES                                                                                                                                                                                                                                                                                                                                                                                                                                                                                                                                                                                                                                                                                                            |
|                               |                                                                                                                                                                                                                                                                                                                                                                                                                                                                                                                                                                                                                                                                                                                                                                                                                                                                             |

SCHOLARONE™  
Manuscripts

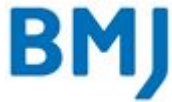

I, the Submitting Author has the right to grant and does grant on behalf of all authors of the Work (as defined in the below author licence), an exclusive licence and/or a non-exclusive licence for contributions from authors who are: i) UK Crown employees; ii) where BMJ has agreed a CC-BY licence shall apply, and/or iii) in accordance with the terms applicable for US Federal Government officers or employees acting as part of their official duties; on a worldwide, perpetual, irrevocable, royalty-free basis to BMJ Publishing Group Ltd ("BMJ") its licensees and where the relevant Journal is co-owned by BMJ to the co-owners of the Journal, to publish the Work in this journal and any other BMJ products and to exploit all rights, as set out in our [licence](#).

The Submitting Author accepts and understands that any supply made under these terms is made by BMJ to the Submitting Author unless you are acting as an employee on behalf of your employer or a postgraduate student of an affiliated institution which is paying any applicable article publishing charge ("APC") for Open Access articles. Where the Submitting Author wishes to make the Work available on an Open Access basis (and intends to pay the relevant APC), the terms of reuse of such Open Access shall be governed by a Creative Commons licence – details of these licences and which [Creative Commons](#) licence will apply to this Work are set out in our licence referred to above.

Other than as permitted in any relevant BMJ Author's Self Archiving Policies, I confirm this Work has not been accepted for publication elsewhere, is not being considered for publication elsewhere and does not duplicate material already published. I confirm all authors consent to publication of this Work and authorise the granting of this licence.

# Health insurance awareness and utilization of healthcare services in India: A rapid review synthesis protocol

Reshmi B.<sup>1a</sup>, Unnikrishnan B.<sup>2b</sup>, Shradha S. Parsekar<sup>3c</sup>, Eti Rajwar<sup>3d</sup>, Ratheebhai V.<sup>4e</sup>, Bhumika

T.V.<sup>3f\*</sup>

## Affiliations:

<sup>1</sup> Health Information Management, Manipal College of Health Professionals, Manipal Academy of Higher Education (MAHE), Manipal, India

<sup>2</sup> Department of Community Medicine, Kasturba Medical College, MAHE, Mangaluru, India

<sup>3</sup> Public Health Evidence South Asia, Prasanna School of Public Health, MAHE, Manipal, India

<sup>4</sup> Manipal School of Communication, MAHE, Manipal, India

## \*Corresponding author:

Room No. 35 Public Health Evidence South Asia, Prasanna School of Public health, MAHE, Manipal 576104, Karnataka, India; Telephone: 08202923449 Email: [bhumika.tv@manipal.edu](mailto:bhumika.tv@manipal.edu)

## Abstract:

**Introduction:** Health insurance is one of the important approaches that can help in boosting universal healthcare coverage through improved healthcare utilization and financial protection. This review is planned to rapidly identify various interventions implemented in India to promote awareness of health insurance and effectiveness of these interventions on the awareness and uptake of health insurance by people of India.

**Methods and analysis:** Based on the World Health organization guidelines, a rapid review synthesis will be carried out. The review will include experimental and observational studies that have included adult population ( $\geq 18$  years) in India. We will include any intervention, policy or program that directly or indirectly affects awareness or uptake of health insurance. Following outcomes will be

1 eligible to be included: awareness or health insurance literacy, attitude such as readiness to buy health  
2 insurance or decision making, uptake of health insurance, utilization of healthcare services in last two  
3 years and demand- and supply-side factors of uptake or awareness of health insurance. Databases  
4 such as PubMed, Web of Science, Scopus, 3ie impact evaluation repository and SSRN will be  
5 searched from January 2010 to July 15, 2020. Additionally, important government websites and  
6 references of the included studies will be scanned to identify potential records. Three authors,  
7 independently, will carry out screening and data extraction. Studies will be categorized into quantitative  
8 and qualitative and mixed methods synthesis will be employed to analyze the findings.  
9

10  
11  
12  
13  
14  
15  
16  
17  
18  
19  
20  
21  
22  
23  
24  
25  
26  
27  
28  
29  
30  
31  
32  
33  
34  
35  
36  
37  
38  
39  
40  
41  
42  
43  
44  
45  
46  
47  
48  
49  
50  
51  
52  
53  
54  
55  
56  
57  
58  
59  
60  
Ethics and dissemination: This review will be based on published studies and will not recruit human  
participants directly, therefore ethical clearance is not applicable. We will disseminate the final  
review findings in conference and peer-reviewed journal.

**Key words:** Awareness; Health Insurance; Healthcare services; India; Protocol

**Word count:** 4455

### **Strengths and limitation of the review**

- This review will use mixed methods analysis involving findings from quantitative and qualitative studies conducted in India.
- We anticipate heterogeneity owing to study designs of potentially included studies, however to mitigate this challenge we have planned to conduct sub-group analysis based on PROGRESS-Plus framework.
- Considering the time constraints we will not critically appraise the included studies for risk of bias.

### **Introduction**

Low- and middle-income countries (LMICs) contribute to around 84% of the world population and 90% of the global burden of disease.<sup>1</sup> People living in LMICs rely majorly on out-of-pocket payments

1  
2 (OOP) as the prime source for managing healthcare expenses, resulting in massive demand for  
3 services and financial burden of households (usually catastrophic), which in turn leads to  
4 impoverishment.<sup>1-5</sup> It is projected that every year, approximately 150 million people experience  
5 financial catastrophe by spending more than 40% on health expenses on other than food.<sup>6</sup> Families  
6 generally spend more than 10 % of household income on illness related expenses, due to which other  
7 household expenses are affected.<sup>3, 5</sup> To make it worse, evidence suggests that per capita spending on  
8 healthcare in many LMICs is expected to increase in coming years.<sup>2</sup> Additionally, the increased costs  
9 of seeking and receiving care can hinder the access to healthcare.<sup>7</sup>

10  
11 The Universal Health Coverage (UHC) is embedded within the sustainable development goals  
12 (SDGs) and aims “to ensure healthy lives and promote well-being for all at all ages by 2030”.<sup>8</sup> It  
13 includes financial risk protection and equal access to quality essential health-care services.<sup>8, 9</sup> In the  
14 other terms, UHC encourages equitable healthcare<sup>2</sup> and many countries are committed to achieving  
15 SDGs through UHC.<sup>10</sup>

16  
17 Health insurance is one of the important approaches that can help in boosting UHC through improved  
18 healthcare utilization and financial protection.<sup>7-9, 11</sup> There are multiple types of insurance in LMICs  
19 that differ with providers (government vs private sector), scales and types of beneficiaries.<sup>8</sup> However,  
20 in many LMICs, due lack of acceptability and unwillingness to pay premiums, health insurance has  
21 limited coverage.<sup>2, 3</sup> This increases the risk of excluding vulnerable and at-risk population who cannot  
22 afford to pay health insurance premium.<sup>8</sup> Additionally, older adults, individuals with disability and  
23 chronic diseases have less probability of enrolling in health insurance schemes or their needs may not  
24 be covered by the scheme.<sup>8</sup>

25  
26 Health insurance policies or programs in India are rather evolving and publicly funded health  
27 insurance schemes are mostly restricted to socio-economically backward people or government  
28 employees.<sup>12</sup> India’s first health insurance program, launched in 1950s, was limited to central  
29 government employees and certain low-income population.<sup>11</sup> Over the years, the private healthcare  
30 provider’s dominance in quality healthcare service provision can be seen.<sup>11</sup> Nevertheless, in the

1  
2 absence of financial protection many economically poor families either give away the care or are  
3  
4 pushed into poverty.<sup>11</sup> In 2002, targeted health insurance programs for low-income households were  
5  
6 introduced by central and state governments in partnership with private sector and NGOs. Since 2002  
7  
8 (recommendations of National Health Policy 2002), 17 plus health insurance schemes have been  
9  
10 launched by various governments in India.<sup>11</sup> The most recent one is ‘Ayushman Bharat’ or Pradhan  
11  
12 Mantri Jan Arogya Yojana (PMJAY) launched in 2018 to achieve UHC; it is fully financed by the  
13  
14 government. PMJAY seeks to cover 500 million persons with an annual cover of around 7000 USD  
15  
16 per household. The main aim of the PMJAY is to lessen the economic burden experienced by poor  
17  
18 and vulnerable groups for access to healthcare facility.<sup>13</sup>  
19  
20  
21  
22

23 Despite availability of multiple health insurance schemes, evidence suggests that the uptake of health  
24  
25 insurance in India is poor. As per recently concluded National Sample Survey Office (NSSO) data,  
26  
27 there were as low as 14% rural and 18 % urban residents of India having some form of health  
28  
29 insurance.<sup>14</sup> This finding is also congruent with other literature, wherein it was reported less than 20%  
30  
31 coverage.<sup>5, 12</sup> Similarly, other LMICs have reported underutilization of national health insurance  
32  
33 schemes.<sup>15</sup>  
34  
35  
36  
37

38 There are multiple factors that are responsible for awareness and enrolment in health insurance  
39  
40 schemes.<sup>2, 3</sup> These factors can be divided into individual (age, gender, education, employment status,  
41  
42 marital status),<sup>3, 9, 16</sup> and household characteristics (wealth, size of family).<sup>1, 9, 17</sup> Other factors are  
43  
44 program related (premium amount, rules, regulation, and procedures), social capital (trust, networks  
45  
46 and group participation, social norms, and solidarity and togetherness features of the social  
47  
48 organization of the community), institutional factors (regulatory mechanisms, complaint handling  
49  
50 systems, and insurance education), and supply side factors (quality of care and distance of house from  
51  
52 the nearest health facility).<sup>3</sup> The aforementioned factors may also determine the consumer preference  
53  
54 in selecting the health insurance.<sup>17</sup> Poor claim returns, poor accountability and non-transparent  
55  
56 operations hinders the uptake of health insurance.<sup>18</sup>  
57  
58  
59  
60

1  
2 In Indian studies, among those participants who did not have health insurance, only 34 % were willing  
3  
4 to pay.<sup>5</sup> Previous research in LMICs suggests that financial status of household is positively  
5  
6 associated with willingness to pay (WTP).<sup>2, 3, 9, 18</sup> Whereas level of education received contradictory  
7  
8 findings i.e. a study conducted in Nigeria reported that education was negatively associated with  
9  
10 WTP<sup>2</sup> contrary to study conducted in Uganda,<sup>1</sup> Ghana,<sup>16</sup> and India.<sup>5</sup> Family who had good perceived  
11  
12 health had less probability of getting insurance as compared to those individuals who perceived their  
13  
14 health as poor. Similarly, those individuals who had chronic diseases were more inclined to have  
15  
16 health insurance than those who did not have chronic diseases.<sup>3</sup> Corruption and mistrust in the health  
17  
18 insurance scheme<sup>1, 5, 18</sup> and expensive plans<sup>5, 18</sup> were some of the reasons for not willing to pay. Lack  
19  
20 of information or health insurance illiteracy is another important reason for not willing to pay.<sup>1, 5, 18</sup>  
21  
22  
23  
24

25 Health insurance literacy is defined as “the degree to which individuals have the knowledge, ability,  
26  
27 and confidence to find and evaluate information about health plans, select the best plan for their own  
28  
29 (or their families) financial and health circumstances, and use the plan once enrolled.”<sup>1</sup> Lack of health  
30  
31 insurance literacy or education hinders the uptake of health insurance and in many LMICs health  
32  
33 insurance literacy is poor. A study conducted in Uganda reported that about 34% of the studied  
34  
35 population were not aware of health insurance.<sup>1</sup> Whereas studies conducted in India (46%),<sup>5</sup>  
36  
37 Myanmar (66%)<sup>4</sup> and the United States: Hispanic American (70%)<sup>19</sup> reported higher proportion of  
38  
39 lack of knowledge among studied population.  
40  
41  
42  
43

44 Familiarity or awareness of the insurance schemes increases the utilization of health insurance and  
45  
46 subsequently help in healthcare uptake.<sup>1, 3, 19</sup> Individuals usually enroll into health insurance because  
47  
48 of their personal experiences, awareness, or word-of-mouth advertisements.<sup>17</sup> Mass media such as  
49  
50 newspaper, radio and television play an important role in making people aware of health insurance  
51  
52 schemes<sup>1</sup> Friends, community meetings, school gatherings, and health workers have an influence on  
53  
54 increasing the health insurance awareness of the people.<sup>1</sup> Although, aforesaid factors help in  
55  
56 increasing the awareness and enrollment in health insurance scheme, some enrollees may not pay  
57  
58 premium on regular basis and might not get to know even after health insurance is lapsed.<sup>9</sup> Women  
59  
60



1 farmers, as compared to other occupation, had more odds of unawareness that their insurance was  
2  
3  
4 lapsed.<sup>9</sup>  
5  
6

7 It is evident from above description that awareness of health insurance among general population in  
8  
9 LMICs is poor. Knowledge about health insurance can boost individuals' confidence and self-  
10  
11 efficacy; thus, it is an important *a priori* factor that is required to get enrolled in health insurance  
12  
13 scheme.<sup>19</sup> Outreach programs to increase general knowledge of health insurance and integrating  
14  
15 health insurance education within health delivery systems may help uptake of health insurance.<sup>19</sup>  
16  
17 Globally there are different methods available to promote and raise awareness about different health  
18  
19 insurance schemes. However, India is a diverse country with a complex health system and numerous  
20  
21 contextual factors. A 'one size fits all' approach for any policy or intervention is not suitable for the  
22  
23 country. Therefore, it is imperative to understand the different approaches implemented to raise  
24  
25 awareness about health insurance in the country. Additionally, due to increased population and a  
26  
27 meagre public health spending on healthcare, it is important to understand if the resources are being  
28  
29 utilized appropriately. To ensure this, understanding of the effectiveness of such policies is important  
30  
31 so that focus is directed towards the useful interventions. The proposed review will therefore will  
32  
33 identify the different approaches and interventions for increasing health insurance awareness in India,  
34  
35 and will give information about the impact of these interventions. This review is planned to answer  
36  
37 following research questions;  
38  
39  
40  
41  
42  
43  
44

- 45 1. What are the various interventions implemented in India to promote awareness of health insurance?  
46
- 47 2. What is the effectiveness of the above interventions on the awareness and uptake of health  
48  
49 insurance by people of India?  
50  
51

## 52 **Methods and analysis**

53  
54  
55 Methodology for this rapid review synthesis will be based on the WHO guidelines on rapid reviews.  
56  
57

58  
59 *Criteria for including studies in the review:*  
60

1  
2 Population: The review will include studies that have included adult population ( $\geq 18$  years) and  
3  
4 confined to studies conducted in India. Studies having household as unit of analysis, we will consider  
5  
6 it if the head of the family is an adult.  
7  
8

9 Intervention/ Exposure: We will include any intervention, policy or program that directly or indirectly  
10  
11 affects awareness of health insurance. The health insurance scheme could be of any type, including  
12  
13 but not limited to, public, private, for profit and not-for-profit. Contribution for premiums could be  
14  
15 made by individual, non-governmental organizations, employer or government. There is no  
16  
17 restriction on focus of health insurance e.g. hospital stay or surgery.  
18  
19

20  
21 Intervention/ Exposure could be educational, informative, training, technology and m- or e-health  
22  
23 related. The interventions could be focused on increasing income threshold for entering health  
24  
25 insurance such as conditional or unconditional cash transfers, which indirectly influences awareness  
26  
27 of health insurance. Similarly, training and performance-based financing for healthcare staff or other  
28  
29 groups will be eligible for inclusion. Intervention could be modification of enrolment procedure,  
30  
31 changes in premium or organizational changes in handling health insurance. Intervention could be  
32  
33 directed on general population or targeted groups such as vulnerable population, indigenous groups,  
34  
35 community leaders, employees, formal or informal groups and healthcare staff.  
36  
37  
38

39  
40 Comparison: This review will not restrict the studies based on comparison as having a comparison  
41  
42 group may not always be feasible.  
43  
44  
45

46 Outcomes:

- 47  
48  
49 i. Awareness/ health insurance literacy (refers to knowledge of the household head on the  
50  
51 presence of insurance schemes, its principles, and significance. The outcome measure can  
52  
53 be objective or subjective.)  
54  
55  
56 ii. Attitude: Readiness to buy health insurance, decision making  
57  
58  
59 iii. Uptake of health insurance  
60

- 1
  - 2
  - 3
  - 4
  - 5
  - 6
  - 7
  - 8
  - 9
  - 10
  - 11
  - 12
  - 13
  - 14
  - 15
  - 16
  - 17
  - 18
  - 19
  - 20
  - 21
  - 22
  - 23
  - 24
  - 25
  - 26
  - 27
  - 28
  - 29
  - 30
  - 31
  - 32
  - 33
  - 34
  - 35
  - 36
  - 37
  - 38
  - 39
  - 40
  - 41
  - 42
  - 43
  - 44
  - 45
  - 46
  - 47
  - 48
  - 49
  - 50
  - 51
  - 52
  - 53
  - 54
  - 55
  - 56
  - 57
  - 58
  - 59
  - 60
- iv. Utilization of healthcare services in last two years
- v. Demand- and supply-side factors of uptake of health insurance/ Awareness of health insurance

Types of study designs: This review will include experimental studies that assessed the effect of intervention to promote awareness and uptake of health insurance. It is sometimes not practical to conduct randomized controlled trials (RCTs) to measure effect of public health interventions, therefore the review will also include other designs. Studies with following designs will be included; RCTs, interrupted time series studies, difference-in-difference, regression discontinuity designs, statistical matching, quasi-randomized and non-randomized trials. Additionally, this review will include prospective, retrospective, cross-sectional and case studies and studies related to process evaluation and policy analysis, if the studies have provided description of intervention or exposure of our interest. Qualitative studies are important source of information about barriers and enabling factors that can complement the findings, therefore we will also include these types of studies. This review will exclude commentaries, perspectives, editorial, reviews and conference abstracts. Policy papers that does not provide details of implementation of intervention will not be considered.

#### *Searching and locating the studies:*

The electronic databases such as PubMed (Medline), Web of Science, and Scopus will be searched to identify potential records. Additionally, 3ie impact evaluation repository and SSRN (Social science research network) will be searched. Databases will be searched from January 2010 till July 15, 2020 and publications will be restricted for English language. Ministry of Health and Family Welfare, Rashtriya Swasthya Bima Yojana (RSBY), Ayushman Bharat, and other state health insurance websites will be searched for reports on the health insurance schemes. We will also scan through references of the included studies for any additional eligible records. After identifying the keywords, initial search will be carried out in PubMed, which will then be replicated in other databases.

Designated information scientist will conduct search. The preliminary search concepts and key terms are given in the table 1.

**Table 1: Search concepts and key words**

| Concept                  | Key terms                                                                                                                                                                                                                                                                                                           |
|--------------------------|---------------------------------------------------------------------------------------------------------------------------------------------------------------------------------------------------------------------------------------------------------------------------------------------------------------------|
| Intervention or Exposure | Information Education Communication<br>IEC<br>Mass Media<br>Television<br>Leaflet<br>Brochure<br>Flyer<br>Radio<br>Television<br>Advertisement<br>Behavioral change communication<br>Awareness program/ programme/ campaign/ initiatives / policy<br>Promotion<br>Marketing<br>Social media<br>E-health<br>M-health |

---

1  
2 Insurance names Community insurance  
3  
4 Health insurance  
5  
6 Health insurance programs / programmes/ schemes  
7  
8 Health finance /financing  
9  
10 Healthcare reform  
11  
12 Insurance coverage  
13  
14 National health insurance  
15  
16 National health insurance scheme  
17  
18 Medical insurance  
19  
20 Micro health insurance  
21  
22 Public health insurance  
23  
24 Social insurance  
25  
26 Social protection  
27  
28 Universal healthcare  
29  
30 Universal health care  
31  
32 UHC  
33  
34 Ayushman Bharat  
35  
36 Pradhan Mantri Jan Arogya Yojana  
37  
38 PMJAY  
39  
40 Mukhyamantri Swasthya Bima Yojana (Chhattisgarh & Uttarakhand)  
41  
42 MSBY  
43  
44 Rashtriya Swasthya Bima Yojana (2008)  
45  
46 RSBY  
47  
48 RSBY Plus HP  
49  
50 Aarogysri  
51  
52 Rajiv Arogyabhagya  
53  
54 Rajiv Arogyashree health insurance  
55  
56 Rajiv Gandhi Jeevandayee Arogya Yojana  
57  
58  
59  
60

---

1  
2 Yesasvini health insurance (Karnataka-2002)  
3  
4 Yashshvini Community based health insurance programme  
5  
6 Vajpayee Arogyashree  
7  
8 Biju Krushak Kalyan  
9  
10 Kalainagar  
11  
12 CHIS  
13  
14 Employee State Insurance Scheme  
15  
16  
17 ESIS  
18  
19 Central Government Health Scheme  
20  
21 CGHS  
22  
23 Mediclaim  
24  
25  
26 Deen Dayal Swasthya Seva Yojana (Goa)  
27  
28  
29  
30  
31  
32  
33  
34  
35  
36  
37  
38  
39  
40  
41  
42  
43  
44  
45  
46  
47  
48  
49  
50  
51  
52  
53  
54  
55  
56  
57  
58  
59  
60

|         |                                                                                                                           |
|---------|---------------------------------------------------------------------------------------------------------------------------|
| Outcome | Awareness of health insurance                                                                                             |
|         | Health insurance literacy                                                                                                 |
|         | Uptake of health insurance                                                                                                |
|         | Utilization of healthcare services                                                                                        |
|         | Enrolment under health insurance                                                                                          |
|         | Health insurance enrolment                                                                                                |
|         | Health insurance retention                                                                                                |
|         | Healthcare utilization                                                                                                    |
|         | Medical service utilization                                                                                               |
|         | Attitude: Readiness to buy health insurance, Decision making                                                              |
|         | Perceptions                                                                                                               |
|         | Knowledge                                                                                                                 |
|         | Demand- and supply-side factors of uptake of health insurance/ Awareness of health insurance: factors, barriers, enablers |

|        |       |
|--------|-------|
| Region | India |
|--------|-------|

*Applying eligibility and screening the studies:*

Result of search strategy will be imported to Endnote X7 reference manager software and duplicates will be removed. MS Excel spreadsheet will be used to screen the records. Based on inclusion and exclusion criteria, all the records will be subjected to two stage - title/abstract (T/A) and full text (FT) - screening process, independently by three (SSP, ER, BTV) reviewers (in pairs). Any disagreements between the reviewers will be resolved by discussion and senior reviewer will be involved in decision making in case of disagreements between the reviewers. The reasons for excluding full texts will be

documented and PRISMA flow diagram will be provided. A detailed screening protocol will be used as a back-up document to aid the screening process. Table 2 gives detailed screening protocol.

**Table 2: Screening protocol**

| <b>1 Title and abstract screening</b> |                                                                                                                                                                                                                                                                                                                                                              |                                                                                       |                                                                                                                                                                                                                                                                |
|---------------------------------------|--------------------------------------------------------------------------------------------------------------------------------------------------------------------------------------------------------------------------------------------------------------------------------------------------------------------------------------------------------------|---------------------------------------------------------------------------------------|----------------------------------------------------------------------------------------------------------------------------------------------------------------------------------------------------------------------------------------------------------------|
| <b>A</b>                              | Is the study published in English?<br>AND Is it published in the year 2000 or later?                                                                                                                                                                                                                                                                         | If answer to both the components are “Yes”<br>Go to B                                 | If it is non-English or published before 2000 then<br>Exclude the study                                                                                                                                                                                        |
| <b>B</b>                              | Is it a study conducted in India?                                                                                                                                                                                                                                                                                                                            | 1. If it is “Yes” OR<br>2. If it is not clearly stated, thus cannot decide<br>Go to C | If it is clearly stated that it is conducted elsewhere, but India, then Exclude the study                                                                                                                                                                      |
| <b>C</b>                              | Does study involve one of the following design or analysis: RCTs, interrupted time series studies, difference-in-difference, regression discontinuity designs, statistical matching, quasi-randomized and non-randomized trials, prospective, retrospective, cross-sectional and case studies and studies related to process evaluation and policy analysis. | If answer is “Yes” OR it is not clearly stated in abstract,<br>Go to D                | If it clearly states that none of the listed methods and designs were used OR if it is commentary, perspective, editorial, reviews, conference abstracts OR policy paper that does not provide details of implementation of intervention:<br>Exclude the study |



|    |          |                                         |                                |
|----|----------|-----------------------------------------|--------------------------------|
| 1  |          |                                         |                                |
| 2  | <b>D</b> | Does the study describe the details of  | If answer to one of the        |
| 3  |          | intervention for increasing awareness   | components is “Yes” OR if      |
| 4  |          | of and uptake of health insurance?      | it is not clearly stated and   |
| 5  |          |                                         | you are in doubt, then         |
| 6  |          | OR                                      |                                |
| 7  |          | Does the study describe about the       | Include the study for full     |
| 8  |          | factors associated with awareness of    | text screening                 |
| 9  |          | and uptake of health insurance?         | If you are in doubt: flag for  |
| 10 |          |                                         | discussion                     |
| 11 |          |                                         |                                |
| 12 |          |                                         |                                |
| 13 |          |                                         |                                |
| 14 |          |                                         |                                |
| 15 |          |                                         |                                |
| 16 |          |                                         |                                |
| 17 |          |                                         |                                |
| 18 |          |                                         |                                |
| 19 |          |                                         |                                |
| 20 | <b>2</b> | <b>Full text screening</b>              |                                |
| 21 |          |                                         |                                |
| 22 |          |                                         |                                |
| 23 | <b>E</b> | Is it a study conducted in India?       | If it is “Yes”                 |
| 24 |          |                                         | Go to F                        |
| 25 |          |                                         | If no Exclude the study        |
| 26 |          |                                         |                                |
| 27 |          |                                         |                                |
| 28 | <b>F</b> | Did study involve adult population?     | If it is “Yes”                 |
| 29 |          |                                         | Go to G                        |
| 30 |          |                                         | If no Exclude the study        |
| 31 |          |                                         |                                |
| 32 |          |                                         |                                |
| 33 | <b>G</b> | Does study involve one of the           | If answer is “Yes” Go to H     |
| 34 |          | following design or analysis: RCTs,     | OR                             |
| 35 |          | interrupted time series studies,        | If you are doubtful, then      |
| 36 |          | difference-in-difference, regression    | flag for discussion            |
| 37 |          | discontinuity designs, statistical      |                                |
| 38 |          | matching, quasi-randomized and non-     |                                |
| 39 |          | randomized trials, prospective,         |                                |
| 40 |          | retrospective, cross-sectional and case |                                |
| 41 |          | studies and studies related to process  |                                |
| 42 |          | evaluation and policy analysis.         |                                |
| 43 |          |                                         | If it clearly states that none |
| 44 |          |                                         | of the listed methods and      |
| 45 |          |                                         | designs were used OR if it is  |
| 46 |          |                                         | commentary, perspective,       |
| 47 |          |                                         | editorial, reviews,            |
| 48 |          |                                         | conference abstracts OR        |
| 49 |          |                                         | policy paper that does not     |
| 50 |          |                                         | provide details of             |
| 51 |          |                                         | implementation of              |
| 52 |          |                                         | intervention:                  |
| 53 |          |                                         | Exclude the study              |
| 54 |          |                                         |                                |
| 55 |          |                                         |                                |
| 56 |          |                                         |                                |
| 57 |          |                                         |                                |
| 58 |          |                                         |                                |
| 59 |          |                                         |                                |
| 60 |          |                                         |                                |

|          |                                                                                                                                                                                                                                         |                                                                                                             |                         |
|----------|-----------------------------------------------------------------------------------------------------------------------------------------------------------------------------------------------------------------------------------------|-------------------------------------------------------------------------------------------------------------|-------------------------|
| <b>H</b> | Does the study describe the details of intervention for increasing awareness of and uptake of health insurance?<br><br>OR<br><br>Does the study describe about the factors associated with awareness of and uptake of health insurance? | If answer to one of the components is “Yes” Go to I OR<br><br>If you are in doubt, then flag for discussion | If no Exclude the study |
| <b>I</b> | Did the study measure the outcomes of our interest?                                                                                                                                                                                     | If answer is “Yes” then Include for data analysis                                                           | If no Exclude the study |

#### *Data extraction:*

Data will be extracted independently by three reviewers (SSP, ER, BTV). A pre-designed data extraction form will be used for extraction of the data. The data extraction form will be subjected to pilot testing and will be revised accordingly as per the suggestions by the reviewers and the experts. Any disagreements during data extraction, will be resolved by consensus and by the senior reviewer. Data will be extracted based on the characteristics mentioned in the table 3.

**Table 3: Data extraction format**

|                            |                                               |
|----------------------------|-----------------------------------------------|
| Publication details        | First author’s last name                      |
|                            | Year of publication                           |
|                            | Publication type: Report/ journal publication |
| Population characteristics | Age                                           |

|                           |                                                                                                           |
|---------------------------|-----------------------------------------------------------------------------------------------------------|
|                           | Gender                                                                                                    |
|                           | Religion/ Race/ Ethnicity                                                                                 |
|                           | Number of participants included                                                                           |
| Location/setting          | State/ district or other details of place where study was conducted                                       |
|                           | Setting: hospital / community based                                                                       |
| Study methodology/ design | Study design: RCT, quasi-randomized trial, case control study etc.                                        |
|                           | Type of analysis                                                                                          |
| Intervention details      | Type of intervention, mode of delivery, other details such as content/<br>frequency, who provided it etc. |
|                           | Details of comparison                                                                                     |
| Exposure details          | List different factors or themes                                                                          |
| Outcome details           | List down outcome, variable type: continuous or categorical, type of<br>analysis                          |
|                           | Effect measures with 95% confidence interval (Such as Odds ratio, Risk<br>ratio, hazard ratio)            |
|                           | Number of participants analyzed, number loss to follow-up                                                 |
|                           | Details of subgroup analysis, if any.                                                                     |
|                           | Themes and sub-themes                                                                                     |
| Other details             |                                                                                                           |

*Data Analysis:*

1  
2 Study characteristics consisting of PICOS components across studies will be tabulated, which will  
3  
4 help us to compare and analyze. Subsequently, studies will be categorized into quantitative and  
5  
6 qualitative and will be analyzed separately. This step will be followed by mixed methods synthesis  
7  
8 as suggested by Panda et al. (2013).<sup>20</sup>  
9

### 10 11 12 1. Quantitative studies:

13  
14  
15 Studies will be grouped based on study design and type of data available (continuous or categorical).  
16  
17 If possible, similar studies will be pooled to perform meta-analysis using random effect measure. If  
18  
19 data are continuous, standardized mean difference will be calculated with 95% confidence interval.  
20  
21 For categorical data, odds ratio or risk ratio will be calculated and reported with 95% confidence  
22  
23 interval. Meta-analysis will be visually represented with forest plot. We assume possibility of  
24  
25 heterogeneity owing to differences in study design, intervention and other contextual factors. If  
26  
27 possible, we will statistically measure heterogeneity by using  $I^2$  test. If significant heterogeneity  
28  
29 (>50%) persists for a particular outcome meta-analysis will not be conducted. We also anticipate the  
30  
31 diversity in the included study methodology and interventions, due to which meta-analysis may not  
32  
33 be appropriate. In this case our focus would be on conducting narrative synthesis. Key finding of  
34  
35 studies will be summarized in tables/ figures or vote counting will be considered.  
36  
37  
38  
39

### 40 41 2. Qualitative synthesis:

42  
43  
44 We will carry out thematic analysis as suggested by Thomas & Harden (2008).<sup>21</sup> An iterative process  
45  
46 of line by line coding will be undertaken as a first step, which will be followed by categorizing the  
47  
48 codes into code families. Subsequently, code tree will be created, and themes and sub-themes will be  
49  
50 generated. Three reviewers (SSP, ER, BTV) will code the data independently and resolve the  
51  
52 discrepancy by discussion until consensus.  
53  
54

### 55 56 3. Mixed methods synthesis:

57  
58  
59 The result from both, qualitative and quantitative synthesis will be merged for each outcome. Parallel  
60  
synthesis will be carried out and findings will be summarized narratively.<sup>20</sup> To understand the

1  
2 influence of inequality in uptake of health insurance, we will explore the possibility of conducting  
3  
4 subgroup analysis based on some of the components of PROGRESS-Plus framework.<sup>22</sup>  
5  
6

7 *Patient and public involvement:*  
8

9  
10 We did not involve patients or public while designing and writing this protocol.  
11  
12

13 **Ethics and Dissemination:**  
14

15  
16 This review will be based on published studies therefore ethical clearance is not applicable. We have  
17  
18 planned following activities to communicate and disseminate the findings of this review. We plan to  
19  
20 make at least one national or international conference presentation. We will prepare policy brief to  
21  
22 be shared with funder and to get a wider reader, we plan to submit the manuscript to a peer-reviewed  
23  
24 journal. Upon journal publication, we intend to circulate the findings through our social media  
25  
26 platform and website.  
27  
28  
29

30  
31 **Author contribution:**  
32

33 Dr Reshmi B is the guarantor of the review. All the authors conceptualized the manuscript. SSP drafted the  
34  
35 first manuscript, which was further edited by ER. RV developed the search strategy. All the authors read,  
36  
37 provided feedback and approved the final manuscript.  
38  
39

40  
41 **Sources of Support:**  
42

43  
44 This work was supported by PHRI-RESEARCH grants awarded by PHFI with the financial support  
45  
46 of Department of Science and Technology (DST). We appreciate the technical support provided by  
47  
48 public Health Evidence South Asia, Prasanna School of Public Health, Manipal Academy of Higher  
49  
50 Education, Manipal. Funder did not have any role in writing this protocol and decision to submit it  
51  
52 for publication. Grant number is not applicable for this funding.  
53  
54  
55

56 **Competing interest:** Authors do not have any competing interest.  
57  
58  
59  
60

## References

1. Basaza R, Kyasiimire EP, Namyalo PK, et al. Willingness to pay for Community Health Insurance among taxi drivers in Kampala City, Uganda: a contingent evaluation. *Risk Manag Healthc Policy*. 2019;12:133-43.
2. Ogundeji YK, Akomolafe B, Ohiri K, et al. Factors influencing willingness and ability to pay for social health insurance in Nigeria. *PLoS One*. 2019;14(8):e0220558-e.
3. Mirach TH, Demissie GD, Biks GA. Determinants of community-based health insurance implementation in west Gojjam zone, Northwest Ethiopia: a community based cross sectional study design. *BMC Health Services Research*. 2019;19(1):544.
4. Myint CY, Pavlova M, Groot W. Health insurance in Myanmar: Knowledge, perceptions, and preferences of Social Security Scheme members and general adult population. *The International journal of health planning and management*. 2019;34(1):346-69.
5. Surendar R AM, Madhumadhi S, Saravanan R, Karrunya S, Srikanth S. Awareness on Health Insurance among a selected Urban Population in Puducherry. *Nat J Res Community Med* 2019;8(2):176-9.
6. Okoroh J, Essoun S, Seddoh A, et al. Evaluating the impact of the national health insurance scheme of Ghana on out of pocket expenditures: a systematic review. *BMC Health Serv Res*. 2018;18(1):426.
7. Kuwawenaruwa A, Ramsey K, Binyaruka P, et al. Implementation and effectiveness of free health insurance for the poor pregnant women in Tanzania: A mixed methods evaluation. *Social Science & Medicine*. 2019;225:17-25.

- 1  
2 8. van Hees SGM, O'Fallon T, Hofker M, et al. Leaving no one behind? Social inclusion of  
3  
4 health insurance in low- and middle-income countries: a systematic review. *International Journal for*  
5  
6 *Equity in Health*. 2019;18(1):134.
- 7  
8  
9 9. Kanmiki EW, Bawah AA, Akazili J, et al. Unawareness of health insurance expiration status  
10  
11 among women of reproductive age in Northern Ghana: implications for achieving universal health  
12  
13 coverage. *Journal of Health, Population and Nutrition*. 2019;38(1):34.
- 14  
15  
16 10. Fadlallah R, El-Jardali F, Hemadi N, et al. Barriers and facilitators to implementation, uptake  
17  
18 and sustainability of community-based health insurance schemes in low- and middle-income  
19  
20 countries: a systematic review. *International journal for equity in health*. 2018;17(1):13.
- 21  
22  
23 11. Maurya D, Mintrom M. Policy entrepreneurs as catalysts of broad system change: the case of  
24  
25 social health insurance adoption in India. *Journal of Asian Public Policy*. 2020;13(1):18-34.
- 26  
27  
28 12. Lagomarsino G, Garabrant A, Adyas A, et al. Moving towards universal health coverage:  
29  
30 health insurance reforms in nine developing countries in Africa and Asia. *The Lancet*.  
31  
32 2012;380(9845):933-43.
- 33  
34  
35 13. Garg S, Bebarta KK, Tripathi N. Performance of India's national publicly funded health  
36  
37 insurance scheme, Pradhan Mantri Jan Arogya Yojana (PMJAY), in improving access and financial  
38  
39 protection for hospital care: findings from household surveys in Chhattisgarh state. *BMC Public*  
40  
41 *Health*. 2020;20(1):949.
- 42  
43  
44 14. Key Indicators of Social Consumption in India Health. *Government of India, Ministry of*  
45  
46 *Statistics and Programme Implementation*; 2014.
- 47  
48  
49 15. Abiola AO, Ladi-Akinyemi TW, Oyeleye OA, et al. Knowledge and utilisation of National  
50  
51 Health Insurance Scheme among adult patients attending a tertiary health facility in Lagos State,  
52  
53 South-Western Nigeria. *Afr J Prim Health Care Fam Med*. 2019;11(1):e1-e7.
- 54  
55  
56 16. Seddoh A, Sataru F. Mundane? Demographic characteristics as predictors of enrolment onto  
57  
58 the National Health Insurance Scheme in two districts of Ghana. *BMC Health Services Research*.  
59  
60 2018;18(1):330.

- 1  
2 17. Michael GC, Aliyu I, Grema BA, et al. Perception of Factors Influencing Primary Health-  
3 Care Facility Choice Among National Health Insurance Enrollees of a Northwest Nigerian Hospital.  
4  
5  
6  
7  
8  
9 18. Ayanore MA, Pavlova M, Kugbey N, et al. Health insurance coverage, type of payment for  
10 health insurance, and reasons for not being insured under the National Health Insurance Scheme in  
11 Ghana. *Health Economics Review*. 2019;9(1):39.  
12  
13  
14  
15  
16 19. Ghaddar S, Byun J, Krishnaswami J. Health insurance literacy and awareness of the  
17 Affordable Care Act in a vulnerable Hispanic population. *Patient education and counseling*.  
18 2018;101(12):2233-40.  
19  
20  
21  
22  
23 20. Panda P, Dror I, Koehlmoos T, et al. What factors affect take up of voluntary and community  
24 based health insurance programmes in low- and middle- income countries? A systematic review  
25 (Protocol). London: EPPI-Centre, Social Science Research Unit, Institute of Education, University  
26 of London, 2013.  
27  
28  
29  
30  
31  
32 21. Thomas J, Harden A. Methods for the thematic synthesis of qualitative research in systematic  
33 reviews. *BMC Medical Research Methodology*. 2008;8(1):45.  
34  
35  
36  
37 22. Oliver S, Kavanagh J, Caird J, et al. Health promotion, inequalities and young people's health.  
38 A systematic review of research. London: EPPI-Centre, Social Science Research Unit, Institute of  
39 Education, University of London, 2008.  
40  
41  
42  
43  
44  
45  
46  
47  
48  
49  
50  
51  
52  
53  
54  
55  
56  
57  
58  
59  
60



**PRISMA-P (Preferred Reporting Items for Systematic review and Meta-Analysis Protocols) 2015 checklist: recommended items to address in a systematic review protocol\***

| Section and topic                 | Item No | Checklist item                                                                                                                                                                                  | Response (Yes or No) | Page number |
|-----------------------------------|---------|-------------------------------------------------------------------------------------------------------------------------------------------------------------------------------------------------|----------------------|-------------|
| <b>ADMINISTRATIVE INFORMATION</b> |         |                                                                                                                                                                                                 |                      |             |
| Title:                            |         |                                                                                                                                                                                                 |                      |             |
| Identification                    | 1a      | Identify the report as a protocol of a systematic review                                                                                                                                        | Yes                  | 1           |
| Update                            | 1b      | If the protocol is for an update of a previous systematic review, identify as such                                                                                                              | Not applicable (NA)  |             |
| Registration                      | 2       | If registered, provide the name of the registry (such as PROSPERO) and registration number                                                                                                      | No                   |             |
| Authors:                          |         |                                                                                                                                                                                                 |                      |             |
| Contact                           | 3a      | Provide name, institutional affiliation, e-mail address of all protocol authors; provide physical mailing address of corresponding author                                                       | Yes                  | 1           |
| Contributions                     | 3b      | Describe contributions of protocol authors and identify the guarantor of the review                                                                                                             | Yes                  | 18          |
| Amendments                        | 4       | If the protocol represents an amendment of a previously completed or published protocol, identify as such and list changes; otherwise, state plan for documenting important protocol amendments | NA                   |             |
| Support:                          |         |                                                                                                                                                                                                 |                      |             |
| Sources                           | 5a      | Indicate sources of financial or other support for the review                                                                                                                                   | Yes                  | 18          |
| Sponsor                           | 5b      | Provide name for the review funder and/or sponsor                                                                                                                                               | Yes                  | 18          |

|                           |     |                                                                                                                                                                                                                               |     |                   |
|---------------------------|-----|-------------------------------------------------------------------------------------------------------------------------------------------------------------------------------------------------------------------------------|-----|-------------------|
| Role of sponsor or funder | 5c  | Describe roles of funder(s), sponsor(s), and/or institution(s), if any, in developing the protocol                                                                                                                            | Yes | 18                |
| <b>INTRODUCTION</b>       |     |                                                                                                                                                                                                                               |     |                   |
| Rationale                 | 6   | Describe the rationale for the review in the context of what is already known                                                                                                                                                 | Yes | 7, last paragraph |
| Objectives                | 7   | Provide an explicit statement of the question(s) the review will address with reference to participants, interventions, comparators, and outcomes (PICO)                                                                      | Yes | 8                 |
| <b>METHODS</b>            |     |                                                                                                                                                                                                                               |     |                   |
| Eligibility criteria      | 8   | Specify the study characteristics (such as PICO, study design, setting, time frame) and report characteristics (such as years considered, language, publication status) to be used as criteria for eligibility for the review | Yes | 8-9               |
| Information sources       | 9   | Describe all intended information sources (such as electronic databases, contact with study authors, trial registers or other grey literature sources) with planned dates of coverage                                         | Yes | 9-10              |
| Search strategy           | 10  | Present draft of search strategy to be used for at least one electronic database, including planned limits, such that it could be repeated                                                                                    | Yes | 9, & table 1      |
| Study records:            |     |                                                                                                                                                                                                                               |     |                   |
| Data management           | 11a | Describe the mechanism(s) that will be used to manage records and data throughout the review                                                                                                                                  | Yes | 13                |
| Selection process         | 11b | State the process that will be used for selecting studies (such as two independent reviewers) through each phase of the review (that is, screening, eligibility and inclusion in meta-analysis)                               | Yes | 13, & table 2     |

|                                    |     |                                                                                                                                                                                                                                                  |                            |               |
|------------------------------------|-----|--------------------------------------------------------------------------------------------------------------------------------------------------------------------------------------------------------------------------------------------------|----------------------------|---------------|
| Data collection process            | 11c | Describe planned method of extracting data from reports (such as piloting forms, done independently, in duplicate), any processes for obtaining and confirming data from investigators                                                           | Yes                        | 15            |
| Data items                         | 12  | List and define all variables for which data will be sought (such as PICO items, funding sources), any pre-planned data assumptions and simplifications                                                                                          | Yes                        | 15, & table 3 |
| Outcomes and prioritization        | 13  | List and define all outcomes for which data will be sought, including prioritization of main and additional outcomes, with rationale                                                                                                             | Yes                        | 9             |
| Risk of bias in individual studies | 14  | Describe anticipated methods for assessing risk of bias of individual studies, including whether this will be done at the outcome or study level, or both; state how this information will be used in data synthesis                             | No. Reported as limitation | 3             |
| Data synthesis                     | 15a | Describe criteria under which study data will be quantitatively synthesised                                                                                                                                                                      | Yes                        | 17-18         |
|                                    | 15b | If data are appropriate for quantitative synthesis, describe planned summary measures, methods of handling data and methods of combining data from studies, including any planned exploration of consistency (such as $I^2$ , Kendall's $\tau$ ) | Yes                        | 17            |
|                                    | 15c | Describe any proposed additional analyses (such as sensitivity or subgroup analyses, meta-regression)                                                                                                                                            | Yes                        | 18            |
|                                    | 15d | If quantitative synthesis is not appropriate, describe the type of summary planned                                                                                                                                                               | Yes                        | 18            |
| Meta-bias(es)                      | 16  | Specify any planned assessment of meta-bias(es) (such as publication bias across studies, selective reporting within studies)                                                                                                                    | No                         |               |
| Confidence in cumulative evidence  | 17  | Describe how the strength of the body of evidence will be assessed (such as GRADE)                                                                                                                                                               | No                         |               |

**\* It is strongly recommended that this checklist be read in conjunction with the PRISMA-P Explanation and Elaboration (cite when available) for important clarification on the items. Amendments to a review protocol should be tracked and dated. The copyright for PRISMA-P (including checklist) is held by the PRISMA-P Group and is distributed under a Creative Commons Attribution Licence 4.0.**

1  
2  
3 *From: Shamseer L, Moher D, Clarke M, Ghersi D, Liberati A, Petticrew M, Shekelle P, Stewart L, PRISMA-P Group. Preferred reporting items for systematic review and*  
4 *meta-analysis protocols (PRISMA-P) 2015: elaboration and explanation. BMJ. 2015 Jan 2;349(jan02 1):g7647.*  
5  
6  
7  
8  
9  
10  
11  
12  
13  
14  
15  
16  
17  
18  
19  
20  
21  
22  
23  
24  
25  
26  
27  
28  
29  
30  
31  
32  
33  
34  
35  
36  
37  
38  
39  
40  
41  
42  
43  
44  
45  
46

For peer review only

# BMJ Open

## Health insurance awareness and its uptake in India: a systematic review protocol

|                                 |                                                                                                                                                                                                                                                                                                                                                                                                                                                                                                                                                                                                                                                                                                                                                                                                                                                         |
|---------------------------------|---------------------------------------------------------------------------------------------------------------------------------------------------------------------------------------------------------------------------------------------------------------------------------------------------------------------------------------------------------------------------------------------------------------------------------------------------------------------------------------------------------------------------------------------------------------------------------------------------------------------------------------------------------------------------------------------------------------------------------------------------------------------------------------------------------------------------------------------------------|
| Journal:                        | <i>BMJ Open</i>                                                                                                                                                                                                                                                                                                                                                                                                                                                                                                                                                                                                                                                                                                                                                                                                                                         |
| Manuscript ID                   | bmjopen-2020-043122.R1                                                                                                                                                                                                                                                                                                                                                                                                                                                                                                                                                                                                                                                                                                                                                                                                                                  |
| Article Type:                   | Protocol                                                                                                                                                                                                                                                                                                                                                                                                                                                                                                                                                                                                                                                                                                                                                                                                                                                |
| Date Submitted by the Author:   | 27-Jan-2021                                                                                                                                                                                                                                                                                                                                                                                                                                                                                                                                                                                                                                                                                                                                                                                                                                             |
| Complete List of Authors:       | B, Reshmi; Manipal Academy of Higher Education, Health Information Management, Manipal College of Health Professionals<br>Unnikrishnan, B.; Manipal Academy of Higher Education, Kasturba Medical College<br>Parsekar, Shradha; Manipal Academy of Higher Education, Public Health Evidence South Asia, Department of Health Information, Prasanna School of Public Health (PSPH), Manipal Academy of Higher Education<br>Rajwar, Eti; Manipal Academy of Higher Education, Public Health Evidence South Asia, Department of health informatics, Prasanna School of Public Health,<br>Vijayamma, Ratheebhai; Manipal Academy of Higher Education, Manipal Institute of Communication<br>VENKATESH, BHUMIKA; Manipal Academy of Higher Education, Public Health Evidence South Asia, Department of health informatics, Prasanna School of Public Health, |
| <b>Primary Subject Heading</b>: | Health policy                                                                                                                                                                                                                                                                                                                                                                                                                                                                                                                                                                                                                                                                                                                                                                                                                                           |
| Secondary Subject Heading:      | Public health                                                                                                                                                                                                                                                                                                                                                                                                                                                                                                                                                                                                                                                                                                                                                                                                                                           |
| Keywords:                       | Health economics < HEALTH SERVICES ADMINISTRATION & MANAGEMENT, Health policy < HEALTH SERVICES ADMINISTRATION & MANAGEMENT, Public health < INFECTIOUS DISEASES                                                                                                                                                                                                                                                                                                                                                                                                                                                                                                                                                                                                                                                                                        |
|                                 |                                                                                                                                                                                                                                                                                                                                                                                                                                                                                                                                                                                                                                                                                                                                                                                                                                                         |

SCHOLARONE™  
Manuscripts

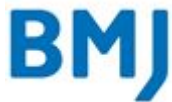

I, the Submitting Author has the right to grant and does grant on behalf of all authors of the Work (as defined in the below author licence), an exclusive licence and/or a non-exclusive licence for contributions from authors who are: i) UK Crown employees; ii) where BMJ has agreed a CC-BY licence shall apply, and/or iii) in accordance with the terms applicable for US Federal Government officers or employees acting as part of their official duties; on a worldwide, perpetual, irrevocable, royalty-free basis to BMJ Publishing Group Ltd ("BMJ") its licensees and where the relevant Journal is co-owned by BMJ to the co-owners of the Journal, to publish the Work in this journal and any other BMJ products and to exploit all rights, as set out in our [licence](#).

The Submitting Author accepts and understands that any supply made under these terms is made by BMJ to the Submitting Author unless you are acting as an employee on behalf of your employer or a postgraduate student of an affiliated institution which is paying any applicable article publishing charge ("APC") for Open Access articles. Where the Submitting Author wishes to make the Work available on an Open Access basis (and intends to pay the relevant APC), the terms of reuse of such Open Access shall be governed by a Creative Commons licence – details of these licences and which [Creative Commons](#) licence will apply to this Work are set out in our licence referred to above.

Other than as permitted in any relevant BMJ Author's Self Archiving Policies, I confirm this Work has not been accepted for publication elsewhere, is not being considered for publication elsewhere and does not duplicate material already published. I confirm all authors consent to publication of this Work and authorise the granting of this licence.

## Health insurance awareness and its uptake in India: a systematic review protocol

Reshmi B.<sup>1a</sup>, Unnikrishnan B.<sup>2b</sup>, Shradha S. Parsekar<sup>3c</sup>, Eti Rajwar<sup>3d</sup>, Ratheebhai V.<sup>4e</sup>,

Bhumika T.V.<sup>3f\*</sup>

### Affiliations:

<sup>1</sup> Health Information Management, Manipal College of Health Professionals, Manipal Academy of Higher Education (MAHE), Manipal, India

<sup>2</sup> Department of Community Medicine, Kasturba Medical College, MAHE, Mangaluru, India

<sup>3</sup> Public Health Evidence South Asia, Prasanna School of Public Health, MAHE, Manipal, India

<sup>4</sup> Manipal School of Communication, MAHE, Manipal, India

### \*Corresponding author:

Room No. 35 Public Health Evidence South Asia, Prasanna School of Public health, MAHE, Manipal 576104, Karnataka, India; Telephone: 08202923449 Email:

[bhumika.tv@manipal.edu](mailto:bhumika.tv@manipal.edu)

**Word count:** 4541 (inclusive of tables but exclusive of references, title page, abstract, and strengths and limitation)

### Abstract:

Introduction: Health insurance is one of the important approaches that can help in boosting universal healthcare coverage through improved healthcare utilization and financial protection.

1  
2  
3 This review is planned to rapidly identify various interventions implemented in India to  
4 promote awareness of health insurance and effectiveness of these interventions on the  
5 awareness and uptake of health insurance by people of India.  
6  
7  
8  
9

10 Methods and analysis: Based on the Cochrane handbook for systematic reviews of  
11 interventions, a systematic review will be carried out. The review will include experimental  
12 and analytical observational studies that have included adult population ( $\geq 18$  years) in India.  
13  
14 We will include any intervention, policy or program that directly or indirectly affects awareness  
15 or uptake of health insurance. Following outcomes will be eligible to be included: awareness  
16 or health insurance literacy, attitude such as readiness to buy health insurance or decision  
17 making, uptake of health insurance, demand- and supply-side factors for awareness of health  
18 insurance and awareness as a factor for uptake and re-enrolment of health insurance. Databases  
19 such as Medline (PubMed), Web of Science, Scopus, 3ie impact evaluation repository and  
20 SSRN will be searched from January 2010 to July 15, 2020. Additionally, important  
21 government websites and references of the included studies will be scanned to identify  
22 potential records. Three authors, independently, will carry out screening and data extraction.  
23  
24 Studies will be categorized into quantitative and qualitative and mixed methods synthesis will  
25 be employed to analyze the findings.  
26  
27  
28  
29  
30  
31  
32  
33  
34  
35  
36  
37  
38  
39  
40  
41

42 Ethics and dissemination: This review will be based on published studies and will not recruit  
43 human participants directly; therefore, ethical clearance is not applicable. We will disseminate  
44 the final review findings in conference and peer-reviewed journal.  
45  
46  
47  
48

49 **Key words:** Awareness; Health Insurance; Healthcare services; India; Protocol  
50  
51

### 52 **Strengths and limitation of the review**

- 53 • This systematic review will use mixed methods analysis involving findings from  
54 quantitative and qualitative studies conducted in India.  
55  
56  
57  
58  
59  
60



- The systematic review will comprehensively search the evidence in various databases, gray literature, and reference and forward citations of included studies however, the publications will be restricted to English.
- We anticipate heterogeneity owing to study designs of potentially included studies, however to mitigate this challenge we have planned to conduct sub-group analysis based on PROGRESS-Plus framework.

## Introduction

Low- and middle-income countries (LMICs) contribute to around 84% of the world population and 90% of the global burden of disease.<sup>1</sup> People living in LMICs rely majorly on out-of-pocket (OOP) payments as the prime source for managing healthcare expenses, resulting in massive demand for services and financial burden of households (usually catastrophic), which in turn leads to impoverishment.<sup>1-5</sup> It is projected that every year, approximately 150 million people experience financial catastrophe by spending more than 40% on health expenses on other than food.<sup>6</sup> Families generally spend more than 10 % of household income on illness related expenses, due to which other household expenses are affected.<sup>2, 5</sup> To make it worse, evidence suggests that per capita spending on healthcare in many LMICs is expected to

1  
2  
3 increase in coming years.<sup>4</sup> Additionally, the increased costs of seeking and receiving care can  
4  
5 hinder the access to healthcare.<sup>7</sup>  
6  
7

8 The Universal Health Coverage (UHC) is embedded within the sustainable development goals  
9 (SDGs) and aims “to ensure healthy lives and promote well-being for all at all ages by 2030”.<sup>8</sup>  
10

11 It includes financial risk protection and equal access to quality essential healthcare services.<sup>8,9</sup>  
12

13 In the other terms, UHC encourages equitable healthcare<sup>2</sup> and many countries are committed  
14  
15 to achieving SDGs through UHC.<sup>10</sup>  
16  
17

18 Health insurance is one of the important approaches that can help in boosting UHC through  
19 improved healthcare utilization and financial protection.<sup>7-9, 11</sup> There are multiple types of  
20 insurance in LMICs that differ with providers (government vs private sector), scales and types  
21 of beneficiaries.<sup>8</sup> However, in many LMICs, due lack of acceptability and unwillingness to pay  
22 premiums, health insurance has limited coverage.<sup>2, 4</sup> This increases the risk of excluding  
23 vulnerable and at-risk population who cannot afford to pay health insurance premium.<sup>8</sup>  
24  
25

26 Additionally, older adults, individuals with disability and chronic diseases have less probability  
27 of enrolling in health insurance schemes or their needs may not be covered by the scheme.<sup>8</sup>  
28  
29

30 Health insurance policies or programs in India are rather evolving and publicly funded health  
31 insurance schemes are mostly restricted to socio-economically backward people or government  
32 employees.<sup>12</sup> India’s first health insurance program, launched in 1950s, was limited to central  
33 government employees and certain low-income population.<sup>11</sup> Over the years, the private  
34 healthcare provider’s dominance in quality healthcare service provision can be seen.<sup>11</sup>  
35  
36 Nevertheless, in the absence of financial protection many economically poor families either  
37 give away the care or are pushed into poverty.<sup>11</sup> In 2002, targeted health insurance programs  
38 for low-income households were introduced by central and state governments in partnership  
39 with private sector and NGOs. Since 2002 (recommendations of National Health Policy 2002),  
40  
41 17 plus health insurance schemes have been launched by various governments in India.<sup>11</sup> The  
42  
43  
44  
45  
46  
47  
48  
49  
50  
51  
52  
53  
54  
55  
56  
57  
58  
59  
60

1  
2  
3 most recent one is 'Ayushman Bharat' or Pradhan Mantri Jan Arogya Yojana (PMJAY) (Prime  
4 minister's health assurance scheme) launched in 2018 to achieve UHC; it is fully financed by  
5  
6 the government. PMJAY seeks to cover 500 million persons with an annual cover of around  
7  
8 7000 USD per household. The main aim of the PMJAY is to lessen the economic burden  
9  
10 experienced by poor and vulnerable groups for access to healthcare facility.<sup>13</sup>  
11  
12

13  
14 Despite availability of multiple health insurance schemes, evidence suggests that the uptake of  
15  
16 health insurance in India is poor. As per recently concluded National Sample Survey Office  
17  
18 (NSSO) data, there were as low as 14% rural and 18 % urban residents of India having some  
19  
20 form of health insurance.<sup>14</sup> This finding is also congruent with other literature, wherein it was  
21  
22 reported less than 20% coverage.<sup>5, 12</sup> Similarly, other LMICs have reported poor registrations  
23  
24 in the national health insurance schemes.<sup>15</sup>  
25  
26

27  
28 There are multiple factors that are responsible for awareness and enrolment in health insurance  
29  
30 schemes.<sup>2, 4</sup> These factors can be divided into individual (age, gender, education, employment  
31  
32 status, marital status),<sup>2, 9, 16</sup> and household characteristics (wealth, size of family).<sup>1, 9, 17</sup> Other  
33  
34 factors are program related (premium amount, rules, regulation, and procedures), social capital  
35  
36 (trust, networks and group participation, social norms, and solidarity and togetherness features  
37  
38 of the social organization of the community), institutional factors (regulatory mechanisms,  
39  
40 complaint handling systems, and insurance education), and supply side factors (quality of care  
41  
42 and distance of house from the nearest health facility).<sup>2</sup> The aforementioned factors may also  
43  
44 determine the consumer preference in selecting the health insurance.<sup>17</sup> Poor claim returns, poor  
45  
46 accountability and non-transparent operations hinders the uptake of health insurance.<sup>18</sup>  
47  
48

49  
50 In Indian studies, among those participants who did not have health insurance, only 34 % were  
51  
52 willing to pay.<sup>5</sup> Previous research in LMICs suggests that financial status of household is  
53  
54 positively associated with willingness to pay (WTP).<sup>2, 4, 9, 18</sup> Whereas level of education  
55  
56 received contradictory findings i.e. a study conducted in Nigeria reported that education was  
57  
58  
59  
60

1  
2  
3 negatively associated with WTP<sup>4</sup> contrary to study conducted in Uganda,<sup>1</sup> Ghana,<sup>16</sup> and India.<sup>5</sup>  
4  
5 Family who had good perceived health had less probability of getting insurance as compared  
6  
7 to those individuals who perceived their health as poor. Similarly, those individuals who had  
8  
9 chronic diseases were more inclined to have health insurance than those who did not have  
10  
11 chronic diseases.<sup>2</sup> Corruption and mistrust in the health insurance scheme<sup>1, 5, 18</sup> and expensive  
12  
13 plans<sup>5, 18</sup> were some of the reasons for not willing to pay. Lack of information or health  
14  
15 insurance illiteracy is another important reason for not willing to pay.<sup>1, 5, 18</sup>  
16  
17 Health insurance literacy is defined as “the degree to which individuals have the knowledge,  
18  
19 ability, and confidence to find and evaluate information about health plans, select the best plan  
20  
21 for their own (or their families) financial and health circumstances, and use the plan once  
22  
23 enrolled.”<sup>1</sup> Lack of health insurance literacy or education hinders the uptake of health insurance  
24  
25 and in many LMICs health insurance literacy is poor. A study conducted in Uganda reported  
26  
27 that about 34% of the studied population were not aware of health insurance.<sup>1</sup> Whereas studies  
28  
29 conducted in India (46%),<sup>5</sup> Myanmar (66%)<sup>3</sup> and the United States: Hispanic American  
30  
31 (70%)<sup>19</sup> reported higher proportion of lack of knowledge among studied population.  
32  
33 Familiarity or awareness of the insurance schemes increases the utilization of health insurance  
34  
35 and subsequently help in healthcare uptake.<sup>1, 2, 19</sup> Individuals usually enroll into health  
36  
37 insurance because of their personal experiences, awareness, or word-of-mouth  
38  
39 advertisements.<sup>17</sup> Mass media such as newspaper, radio and television play an important role  
40  
41 in making people aware of health insurance schemes.<sup>1</sup> Friends, community meetings, school  
42  
43 gatherings, and health workers have an influence on increasing the health insurance awareness  
44  
45 of the people.<sup>1</sup> Although, aforesaid factors help in increasing the awareness and enrollment in  
46  
47 health insurance scheme, some enrollees may not pay premium on regular basis and might not  
48  
49 get to know even after health insurance is lapsed.<sup>9</sup> Women farmers, as compared to other  
50  
51 occupation, had more odds of unawareness that their insurance was lapsed.<sup>9</sup>  
52  
53  
54  
55  
56  
57  
58  
59  
60

1  
2  
3 It is evident from above description that awareness of health insurance among general  
4 population in LMICs is poor. Knowledge about health insurance can boost individuals'  
5 confidence and self-efficacy; thus, it is an important *a priori* factor that is required to get  
6 enrolled in health insurance scheme.<sup>19</sup> Outreach programs to increase general knowledge of  
7 health insurance and integrating health insurance education within health delivery systems may  
8 help uptake of health insurance.<sup>19</sup> Globally there are different methods available to promote  
9 and raise awareness about different health insurance schemes. However, India is a diverse  
10 country with a complex health system and numerous contextual factors. A 'one size fits all'  
11 approach for any policy or intervention is not suitable for the country. Therefore, it is  
12 imperative to understand the different approaches implemented to raise awareness about health  
13 insurance in the country. Additionally, due to increased population and a meagre public health  
14 spending on healthcare, it is important to understand if the resources are being utilized  
15 appropriately. To ensure this, understanding of the effectiveness of such policies is important  
16 so that focus is directed towards the useful interventions. 'Ayushman Bharat Scheme- PMJAY'  
17 scheme is implemented to ensure increased utilization of the healthcare facilities with financial  
18 protection of the beneficiaries. The evidence available on the effectiveness of the PMJAY  
19 scheme states no effect of the scheme on utilization of healthcare and financial protection of  
20 enrolled beneficiaries<sup>13</sup> however, this evidence is limited. Therefore, in India context, it is  
21 important to understand if awareness is a factor that has led to decreased utilization of PMJAY  
22 or failure of the other schemes (viz. Rashtriya Swasthya Bima Yojana-RSBY) in securing  
23 financial protection of the beneficiaries.<sup>20</sup> Also, it is vital to understand the importance of  
24 awareness programs for success of the HI schemes, which will be the focus of this review.

25  
26  
27  
28  
29  
30  
31  
32  
33  
34  
35  
36  
37  
38  
39  
40  
41  
42  
43  
44  
45  
46  
47  
48  
49  
50  
51  
52  
53  
54  
55  
56  
57  
58  
59  
60  
A systematic review will help in synthesizing high quality evidence in a systematic manner,  
for this important topic of interest. The proposed systematic review will therefore identify the  
different approaches and interventions for increasing health insurance awareness in India and

1  
2  
3 will give information about the impact of these interventions. This review is planned to answer  
4 following research questions;  
5

6  
7  
8 1. What are the various interventions implemented in India to promote awareness of health  
9 insurance?  
10

11  
12 2. What is the effectiveness of the above interventions on the awareness and uptake of health  
13 insurance by people of India?  
14  
15

### 16 17 18 **Methods and analysis**

19  
20 Methodology for this systematic review will be based on the Cochrane handbook for systematic  
21 reviews of interventions<sup>21</sup> and we have adhered to PRISMA-P guidelines for reporting this  
22 protocol.<sup>22</sup>  
23  
24  
25

#### 26 27 28 *Criteria for including studies in the review:*

29  
30 Population: The review will include studies that have included adult population ( $\geq 18$  years)  
31 and confined to studies conducted in India. In those studies, having household as unit of  
32 analysis, we will consider it if the head of the family or the member who was interviewed is an  
33 adult.  
34  
35

36  
37 Intervention/ Exposure: We will include any intervention, policy or program that directly or  
38 indirectly affects awareness of health insurance. The health insurance scheme could be of any  
39 type, including but not limited to, public, private, for profit and not-for-profit. Contribution for  
40 premiums could be made by individual, non-governmental organizations, employer or  
41 government. There is no restriction on focus of health insurance e.g., hospital stay, surgery or  
42 critical illness.  
43  
44

45  
46 Intervention/ exposure could be educational, informative, training, technology and m- or e-  
47 health related. The interventions could be focused on increasing income threshold for entering  
48 health insurance such as conditional or unconditional cash transfers, which indirectly  
49  
50  
51  
52  
53  
54  
55  
56  
57  
58  
59  
60

1  
2  
3 influences awareness of health insurance. Similarly, training and performance-based financing  
4 for healthcare staff or other groups will be eligible for inclusion. Intervention could be  
5  
6 modification of enrolment procedure, changes in premium or organizational changes in  
7  
8 handling health insurance. Intervention could be directed on general population or targeted  
9  
10 groups such as vulnerable population, indigenous groups, community leaders, employees,  
11  
12 formal or informal groups and healthcare staff.  
13  
14  
15

16  
17 Comparison: This review will not restrict the studies based on comparison as having a  
18  
19 comparison group may not always be feasible.  
20  
21

22 Outcomes:

- 23  
24 i. Awareness/ health insurance literacy (refers to knowledge of the household head or  
25  
26 household member on the presence of insurance schemes, its principles, and  
27  
28 significance. The outcome measure can be objective or subjective.)  
29  
30 ii. Attitude: Readiness to buy health insurance, decision making  
31  
32  
33 iii. Uptake of health insurance  
34  
35  
36 iv. Demand- and supply-side factors for awareness of health insurance  
37  
38 v. Awareness of health insurance as a factor for uptake or re-enrolment of health  
39  
40 insurance  
41

42 Types of study designs: This review will include experimental studies that assessed the effect  
43  
44 of intervention to promote awareness and uptake of health insurance. It is sometimes not  
45  
46 practical to conduct randomized controlled trials (RCTs) to measure effect of public health  
47  
48 interventions, therefore the review will also include other designs. Studies with following  
49  
50 designs will be included; RCTs, interrupted time series studies, difference-in-difference,  
51  
52 regression discontinuity designs, statistical matching, quasi-randomized and non-randomized  
53  
54 trials. Additionally, this review will include prospective, retrospective, analytical cross-  
55  
56 sectional and studies related to process evaluation and policy analysis, if the studies have  
57  
58  
59  
60

provided description of intervention or exposure of our interest. Qualitative studies are important source of information about barriers and enabling factors that can complement the findings, therefore we will also include these types of studies. This review will exclude commentaries, perspectives, editorial, reviews and conference abstracts. Policy papers that do not provide details of implementation of intervention will not be considered. We will also exclude descriptive (prevalence) cross-sectional studies.

*Searching and locating the studies:*

The electronic databases such as PubMed (Medline), Web of Science, and Scopus will be searched to identify potential records. Additionally, 3ie impact evaluation repository and SSRN (Social science research network) will be searched. Databases will be searched from January 2010 till July 15, 2020 and publications will be restricted for English language. Ministry of Health and Family Welfare, RSBY, Ayushman Bharat, and other state health insurance websites will be searched for reports on the health insurance schemes. We will also scan through references of the included studies for any additional eligible records. After identifying the keywords, initial search will be carried out in PubMed, which will then be replicated in other databases. Designated information scientist will conduct search. The preliminary search concepts and key terms are given in the table 1.

**Table 1: Search concepts and key words**

| Concept | Key terms |
|---------|-----------|
|         |           |



---

|    |                                                              |
|----|--------------------------------------------------------------|
| 1  |                                                              |
| 2  |                                                              |
| 3  |                                                              |
| 4  | Intervention or                                              |
| 5  | Information Education Communication                          |
| 6  | Exposure                                                     |
| 7  | IEC                                                          |
| 8  | Mass Media                                                   |
| 9  |                                                              |
| 10 | Television                                                   |
| 11 |                                                              |
| 12 | Leaflet                                                      |
| 13 |                                                              |
| 14 | Brochure                                                     |
| 15 |                                                              |
| 16 | Flyer                                                        |
| 17 |                                                              |
| 18 | Radio                                                        |
| 19 |                                                              |
| 20 | Television                                                   |
| 21 |                                                              |
| 22 | Advertisement                                                |
| 23 |                                                              |
| 24 | Behavioral change communication                              |
| 25 |                                                              |
| 26 | Awareness program/ programme/ campaign/ initiatives / policy |
| 27 |                                                              |
| 28 | Promotion                                                    |
| 29 |                                                              |
| 30 | Marketing                                                    |
| 31 |                                                              |
| 32 | Social media                                                 |
| 33 |                                                              |
| 34 | E-health                                                     |
| 35 |                                                              |
| 36 | M-health                                                     |
| 37 |                                                              |
| 38 |                                                              |
| 39 |                                                              |
| 40 |                                                              |
| 41 |                                                              |
| 42 |                                                              |
| 43 |                                                              |
| 44 |                                                              |
| 45 |                                                              |
| 46 |                                                              |
| 47 |                                                              |
| 48 |                                                              |
| 49 |                                                              |
| 50 |                                                              |
| 51 |                                                              |
| 52 |                                                              |
| 53 |                                                              |
| 54 |                                                              |
| 55 |                                                              |
| 56 |                                                              |
| 57 |                                                              |
| 58 |                                                              |
| 59 |                                                              |
| 60 |                                                              |

---

---

|    |                                                                |
|----|----------------------------------------------------------------|
| 1  |                                                                |
| 2  |                                                                |
| 3  |                                                                |
| 4  | Insurance names                                                |
| 5  | Community insurance                                            |
| 6  | Health insurance                                               |
| 7  |                                                                |
| 8  | Health insurance programs / programmes/ schemes                |
| 9  |                                                                |
| 10 | Health finance /financing                                      |
| 11 |                                                                |
| 12 | Healthcare reform                                              |
| 13 |                                                                |
| 14 | Insurance coverage                                             |
| 15 |                                                                |
| 16 | National health insurance                                      |
| 17 |                                                                |
| 18 | National health insurance scheme                               |
| 19 |                                                                |
| 20 | Medical insurance                                              |
| 21 |                                                                |
| 22 | Micro health insurance                                         |
| 23 |                                                                |
| 24 | Public health insurance                                        |
| 25 |                                                                |
| 26 | Social insurance                                               |
| 27 |                                                                |
| 28 | Social protection                                              |
| 29 |                                                                |
| 30 | Universal healthcare                                           |
| 31 |                                                                |
| 32 | Universal health care                                          |
| 33 |                                                                |
| 34 | UHC                                                            |
| 35 |                                                                |
| 36 | Ayushman Bharat                                                |
| 37 |                                                                |
| 38 | Pradhan Mantri Jan Arogya Yojana                               |
| 39 |                                                                |
| 40 | PMJAY                                                          |
| 41 |                                                                |
| 42 | Mukhyamantri Swasthya Bima Yojana (Chhattisgarh & Uttarakhand) |
| 43 |                                                                |
| 44 | MSBY                                                           |
| 45 |                                                                |
| 46 | Rashtriya Swasthya Bima Yojana (2008)                          |
| 47 |                                                                |
| 48 | RSBY                                                           |
| 49 |                                                                |
| 50 | RSBY Plus HP                                                   |
| 51 |                                                                |
| 52 |                                                                |
| 53 |                                                                |
| 54 |                                                                |
| 55 |                                                                |
| 56 |                                                                |
| 57 |                                                                |
| 58 |                                                                |
| 59 |                                                                |
| 60 |                                                                |

---

---

1  
2  
3  
4 Aarogysri  
5  
6 Rajiv Arogyabhagya  
7  
8 Rajiv Arogyashree health insurance  
9  
10 Rajiv Gandhi Jeevodayee Arogya Yojana  
11  
12 Yesasvini health insurance (Karnataka-2002)  
13  
14 Yashshvini Community based health insurance programme  
15  
16 Vajpayee Arogyashree  
17  
18 Biju Krushak Kalyan  
19  
20 Kalainagar  
21  
22 CHIS  
23  
24 Employee State Insurance Scheme  
25  
26 ESIS  
27  
28 Central Government Health Scheme  
29  
30 CGHS  
31  
32 Mediclaim  
33  
34 Deen Dayal Swasthya Seva Yojana (Goa)  
35  
36  
37  
38  
39  
40  
41  
42  
43  
44  
45  
46  
47  
48  
49  
50  
51  
52  
53  
54  
55  
56  
57  
58  
59  
60

---

|         |                                                                                                                                                                                                                                                                                                                                                                                                                                                                                                                                                                                                                       |
|---------|-----------------------------------------------------------------------------------------------------------------------------------------------------------------------------------------------------------------------------------------------------------------------------------------------------------------------------------------------------------------------------------------------------------------------------------------------------------------------------------------------------------------------------------------------------------------------------------------------------------------------|
| Outcome | <p>Awareness of health insurance</p> <p>Health insurance literacy</p> <p>Uptake of health insurance</p> <p>Utilization of healthcare services</p> <p>Enrolment under health insurance</p> <p>Health insurance enrolment</p> <p>Health insurance retention</p> <p>Healthcare utilization</p> <p>Medical service utilization</p> <p>Attitude: Readiness to buy health insurance, Decision making</p> <p>Perceptions</p> <p>Knowledge</p> <p>Demand- and supply-side factors for awareness of health insurance: factors, barriers, enablers and awareness as a factor for uptake or re-enrolment of health insurance</p> |
| Region  | India                                                                                                                                                                                                                                                                                                                                                                                                                                                                                                                                                                                                                 |

*Applying eligibility and screening the studies:*

Result of search strategy will be imported to Endnote X7 reference manager software and duplicates will be removed. MS Excel spreadsheet will be used to screen the records. Based on inclusion and exclusion criteria, all the records will be subjected to two stage - title/abstract (T/A) and full text (FT) - screening process, independently by three (SSP, ER, BTV) reviewers

(in pairs). Any disagreements between the reviewers will be resolved by discussion and senior reviewer will be involved in decision making in case of disagreements between the reviewers. The reasons for excluding full texts will be documented and PRISMA flow diagram will be provided. A detailed screening protocol will be used as a back-up document to aid the screening process. Table 2 gives detailed screening protocol.

**Table 2: Screening protocol**

| <b>1 Title and abstract screening</b> |                                                                                      |                                                                                           |
|---------------------------------------|--------------------------------------------------------------------------------------|-------------------------------------------------------------------------------------------|
| <b>A</b>                              | Is the study published in English? AND<br>Is it published in the year 2000 or later? | If answer to both the components are “Yes”<br>Go to B                                     |
|                                       |                                                                                      | If it is non-English or published before 2000 then Exclude the study                      |
| <b>B</b>                              | Is it a study conducted in India?                                                    | 1. If it is “Yes” OR<br>2. If it is not clearly stated, thus cannot decide<br>Go to C     |
|                                       |                                                                                      | If it is clearly stated that it is conducted elsewhere, but India, then Exclude the study |

|    |          |                                            |                             |
|----|----------|--------------------------------------------|-----------------------------|
| 1  |          |                                            |                             |
| 2  |          |                                            |                             |
| 3  |          |                                            |                             |
| 4  | <b>C</b> | Does study involve one of the following    | If answer is “Yes”          |
| 5  |          | design or analysis: RCTs, interrupted      | OR it is not clearly        |
| 6  |          | time series studies, difference-in-        | stated in abstract,         |
| 7  |          | difference, regression discontinuity       | Go to D                     |
| 8  |          | designs, statistical matching, quasi-      |                             |
| 9  |          | randomized and non-randomized trials,      |                             |
| 10 |          | prospective, retrospective, and analytical |                             |
| 11 |          | cross-sectional studies and studies        |                             |
| 12 |          | related to process evaluation and policy   |                             |
| 13 |          | analysis.                                  |                             |
| 14 |          |                                            | If the study is descriptive |
| 15 |          |                                            | cross-sectional (or         |
| 16 |          |                                            | prevalence study) having    |
| 17 |          |                                            | single group OR if the      |
| 18 |          |                                            | publication is a            |
| 19 |          |                                            | commentary, perspective,    |
| 20 |          |                                            | editorial, reviews,         |
| 21 |          |                                            | conference abstracts OR     |
| 22 |          |                                            | policy paper that does not  |
| 23 |          |                                            | provide details of          |
| 24 |          |                                            | implementation of           |
| 25 |          |                                            | intervention:               |
| 26 |          |                                            | Exclude the study           |
| 27 |          |                                            |                             |
| 28 |          |                                            |                             |
| 29 |          |                                            |                             |
| 30 |          |                                            |                             |
| 31 |          |                                            |                             |
| 32 |          |                                            |                             |
| 33 |          |                                            |                             |
| 34 |          |                                            |                             |
| 35 |          |                                            |                             |
| 36 |          |                                            |                             |
| 37 |          |                                            |                             |
| 38 |          |                                            |                             |
| 39 |          |                                            |                             |
| 40 |          |                                            |                             |
| 41 |          |                                            |                             |
| 42 |          |                                            |                             |
| 43 |          |                                            |                             |
| 44 |          |                                            |                             |
| 45 |          |                                            |                             |
| 46 |          |                                            |                             |
| 47 |          |                                            |                             |
| 48 |          |                                            |                             |
| 49 |          |                                            |                             |
| 50 |          |                                            |                             |
| 51 |          |                                            |                             |
| 52 |          |                                            |                             |
| 53 |          |                                            |                             |
| 54 |          |                                            |                             |
| 55 |          |                                            |                             |
| 56 |          |                                            |                             |
| 57 |          |                                            |                             |
| 58 |          |                                            |                             |
| 59 |          |                                            |                             |
| 60 |          |                                            |                             |

| D                                           | Does the study describe the intervention for increasing awareness of and uptake of health insurance? | If answer to one of the components is “Yes” OR if it is not clearly stated and you are in doubt, then Include the study for full text screening | If no Exclude the study |
|---------------------------------------------|------------------------------------------------------------------------------------------------------|-------------------------------------------------------------------------------------------------------------------------------------------------|-------------------------|
| [The intervention could be any              |                                                                                                      |                                                                                                                                                 |                         |
| intervention, policy or program (e.g.       |                                                                                                      |                                                                                                                                                 |                         |
| Behavioral change communication or          |                                                                                                      |                                                                                                                                                 |                         |
| educational) that directly or indirectly    |                                                                                                      |                                                                                                                                                 |                         |
| affects awareness of health insurance.      |                                                                                                      |                                                                                                                                                 |                         |
| There is no restriction on mode of          |                                                                                                      |                                                                                                                                                 |                         |
| intervention e.g. Mass media or group       |                                                                                                      |                                                                                                                                                 |                         |
| discussions. There is no restriction on     |                                                                                                      |                                                                                                                                                 |                         |
| who provides the intervention e.g.          |                                                                                                      |                                                                                                                                                 |                         |
| researcher, community-based workers or      |                                                                                                      |                                                                                                                                                 |                         |
| insurance agent. There is no restriction    |                                                                                                      |                                                                                                                                                 |                         |
| on duration and frequency of providing      |                                                                                                      |                                                                                                                                                 |                         |
| intervention. The health insurance          |                                                                                                      |                                                                                                                                                 |                         |
| scheme could be of any type, including      |                                                                                                      |                                                                                                                                                 |                         |
| but not limited to, public, private, for    |                                                                                                      |                                                                                                                                                 |                         |
| profit and not-for-profit. Contribution for |                                                                                                      |                                                                                                                                                 |                         |
| premiums could be made by individual,       |                                                                                                      |                                                                                                                                                 |                         |
| non-governmental organizations,             |                                                                                                      |                                                                                                                                                 |                         |
| employer or government. There is no         |                                                                                                      |                                                                                                                                                 |                         |
| restriction on focus of health insurance    |                                                                                                      |                                                                                                                                                 |                         |
| e.g. hospital stay or surgery.]             |                                                                                                      |                                                                                                                                                 |                         |

1  
2  
3  
4 OR

---

5  
6 Does the study describe about the factors  
7  
8 associated with awareness of health  
9  
10 insurance?

11  
12  
13 OR

14  
15 Does the study describe awareness as a  
16  
17 factor for uptake or re-enrolment of  
18  
19 health insurance?  
20  
21  
22  
23  
24  
25  
26  
27  
28  
29  
30  
31  
32  
33  
34  
35  
36  
37  
38  
39  
40  
41  
42  
43  
44  
45  
46  
47  
48  
49  
50  
51  
52  
53  
54  
55  
56  
57  
58  
59  
60



---

## 2 Full text screening

---

|          |                                                                                                                                                                                                                                                                                                                                                                    |                                                                                         |                                                                                                                                                                                                                                                                                             |
|----------|--------------------------------------------------------------------------------------------------------------------------------------------------------------------------------------------------------------------------------------------------------------------------------------------------------------------------------------------------------------------|-----------------------------------------------------------------------------------------|---------------------------------------------------------------------------------------------------------------------------------------------------------------------------------------------------------------------------------------------------------------------------------------------|
| <b>E</b> | Is it a study conducted in India?                                                                                                                                                                                                                                                                                                                                  | If it is “Yes”                                                                          | If no Exclude the study                                                                                                                                                                                                                                                                     |
|          |                                                                                                                                                                                                                                                                                                                                                                    | Go to F                                                                                 |                                                                                                                                                                                                                                                                                             |
| <b>F</b> | Did study involve adult population?                                                                                                                                                                                                                                                                                                                                | If it is “Yes”                                                                          | If no Exclude the study                                                                                                                                                                                                                                                                     |
|          |                                                                                                                                                                                                                                                                                                                                                                    | Go to G                                                                                 |                                                                                                                                                                                                                                                                                             |
| <b>G</b> | Does study involve one of the following design or analysis: RCTs, interrupted time series studies, difference-in-difference, regression discontinuity designs, statistical matching, quasi-randomized and non-randomized trials, prospective, retrospective, and analytical cross-sectional studies and studies related to process evaluation and policy analysis. | If answer is “Yes”<br>Go to H OR<br>If you are doubtful,<br>then flag for<br>discussion | If the study is descriptive cross-sectional (or prevalence study) having single group OR<br>If the publication is a commentary, perspective, editorial, reviews, conference abstracts or policy paper that does not provide details of implementation of intervention:<br>Exclude the study |

---

|                                                                                                                                                                                                                                                                                                                                                                                                                                                                                                                                                                                                                                                                                                                                                                                                                                                                                                                                           |                                                                                                             |                                |
|-------------------------------------------------------------------------------------------------------------------------------------------------------------------------------------------------------------------------------------------------------------------------------------------------------------------------------------------------------------------------------------------------------------------------------------------------------------------------------------------------------------------------------------------------------------------------------------------------------------------------------------------------------------------------------------------------------------------------------------------------------------------------------------------------------------------------------------------------------------------------------------------------------------------------------------------|-------------------------------------------------------------------------------------------------------------|--------------------------------|
| <p><b>H</b> Does the study describe the intervention for increasing awareness of and uptake of health insurance? [The intervention could be any intervention, policy or program (e.g. Behavioral change communication or educational) that directly or indirectly affects awareness of health insurance. There is no restriction on mode of intervention e.g. Mass media or group discussions. There is no restriction on who provides the intervention e.g. researcher, community-based workers or insurance agent. There is no restriction on duration and frequency of providing intervention. The health insurance scheme could be of any type, including but not limited to, public, private, for profit and not-for-profit. Contribution for premiums could be made by individual, non-governmental organizations, employer or government. There is no restriction on focus of health insurance e.g. hospital stay or surgery.]</p> | <p>If answer to one of the components is “Yes” Go to I OR If you are in doubt, then flag for discussion</p> | <p>If no Exclude the study</p> |
|-------------------------------------------------------------------------------------------------------------------------------------------------------------------------------------------------------------------------------------------------------------------------------------------------------------------------------------------------------------------------------------------------------------------------------------------------------------------------------------------------------------------------------------------------------------------------------------------------------------------------------------------------------------------------------------------------------------------------------------------------------------------------------------------------------------------------------------------------------------------------------------------------------------------------------------------|-------------------------------------------------------------------------------------------------------------|--------------------------------|

1  
2  
3  
4 OR

5  
6 Does the study describe about the factors  
7  
8 associated with awareness of health  
9  
10 insurance?

11  
12  
13 OR

14 Does the study describe awareness as a  
15  
16  
17 factor for uptake or re-enrolment of  
18  
19 health insurance?  
20  
21  
22  
23  
24  
25  
26  
27  
28  
29  
30  
31  
32  
33  
34  
35  
36  
37  
38  
39  
40  
41  
42  
43  
44  
45  
46  
47  
48  
49  
50  
51  
52  
53  
54  
55  
56  
57  
58  
59  
60

---

1  
2  
3  
4 **I** Did the study measure the outcomes of If answer is “Yes” If no Exclude the study  
5 our interest? then Include for  
6 data analysis  
7  
8  
9

---

10  
11  
12  
13  
14  
15  
16  
17 *Data extraction:*

18  
19 Data will be extracted independently by three reviewers (SSP, ER, BTV). A pre-designed data  
20 extraction form will be used for extraction of the data. The data extraction form will be  
21 subjected to pilot testing and will be revised accordingly as per the suggestions by the reviewers  
22 and the experts. Any disagreements during data extraction, will be resolved by consensus and  
23 by the senior reviewer. Data will be extracted based on the characteristics mentioned in the  
24 table 3.  
25  
26  
27  
28  
29  
30  
31  
32  
33

34 **Table 3: Data extraction format**

|                                                                      |                            |                                               |
|----------------------------------------------------------------------|----------------------------|-----------------------------------------------|
| 35<br>36<br>37<br>38<br>39<br>40<br>41<br>42<br>43<br>44             | Publication details        | First author’s last name                      |
|                                                                      |                            | Year of publication                           |
|                                                                      |                            | Publication type: Report/ journal publication |
| 45<br>46<br>47<br>48<br>49<br>50<br>51<br>52<br>53<br>54<br>55<br>56 | Population characteristics | Age                                           |
|                                                                      |                            | Gender                                        |
|                                                                      |                            | Religion/ Race/ Ethnicity                     |
|                                                                      |                            | Number of participants included               |

---

|                              |                                                                                                                                                                                                                                                                                                                                                                         |
|------------------------------|-------------------------------------------------------------------------------------------------------------------------------------------------------------------------------------------------------------------------------------------------------------------------------------------------------------------------------------------------------------------------|
| Location/setting             | State/ district or other details of place where study was conducted                                                                                                                                                                                                                                                                                                     |
|                              | Setting: hospital / community based                                                                                                                                                                                                                                                                                                                                     |
|                              | Rural/urban                                                                                                                                                                                                                                                                                                                                                             |
| Study methodology/<br>design | Study design: RCT, quasi-randomized trial, case control study etc.<br>Type of analysis                                                                                                                                                                                                                                                                                  |
| Intervention details         | Type of intervention, mode of delivery, other details such as<br>content/ frequency, who provided it etc.<br>Start time and duration of intervention<br>Details of comparison                                                                                                                                                                                           |
| Insurance details            | Public/ private/ community-based insurance<br>Start or launch date (month and year) of insurance<br>Type of plan e.g. individual, family, senior citizen, critical illness<br>etc.<br>Benefits of health insurance e.g. Cashless facility, hospitalization,<br>pre- and post-hospitalization, medical check-up, maternity benefits,<br>childcare, critical illness etc. |
| Exposure details             | List different factors or themes                                                                                                                                                                                                                                                                                                                                        |

|                 |                                                                                             |
|-----------------|---------------------------------------------------------------------------------------------|
| Outcome details | List down outcome, variable type: continuous or categorical, type of analysis               |
|                 | Effect measures with 95% confidence interval (Such as Odds ratio, Risk ratio, hazard ratio) |
|                 | Number of participants analyzed, number loss to follow-up                                   |
|                 | Details of subgroup analysis, if any.                                                       |
|                 | Themes and sub-themes                                                                       |

---

Other details

---

*Critical appraisal of included studies:*

Effective public health practice project (EPHPP) tool<sup>23</sup> will be used to assess the critical appraisal of quantitative studies (except observational) and Newcastle-Ottawa scale (NOS)<sup>24</sup> for observational studies. The EPHPP rates the study as ‘strong’, ‘moderate’ or ‘weak’ based on eight domains. These domains are selection bias, study design, confounders, blinding, data collection methods, withdrawals and dropouts, intervention integrity and analysis.<sup>23</sup> NOS rates the study based on three domains viz. selection, comparability and outcome, and the final score ranges between 0 and 10.<sup>24</sup> Reviewers (BTV, ER and SSP), independently in pairs, will appraise the included studies. Should there be any discrepancies between the reviewers, it will be resolved by discussion until consensus. If required, senior reviewer will be involved as arbitrator and final decision maker to rate the study quality.

*Data Analysis:*

1  
2  
3 Study characteristics consisting of PICOS components across studies will be tabulated, which  
4 will help us to compare and analyze. Subsequently, studies will be categorized into quantitative  
5 and qualitative and will be analyzed separately. This step will be followed by mixed methods  
6 synthesis as suggested by Panda et al. (2013).<sup>25</sup>  
7  
8  
9  
10  
11

#### 12 13 1. Quantitative studies:

14  
15 Studies will be grouped based on study design, and type of data available (continuous or  
16 categorical). If possible, similar studies will be pooled to perform meta-analysis using random  
17 effect measure. If data are continuous, standardized mean difference will be calculated with  
18 95% confidence interval. For categorical data, odds ratio or risk ratio will be calculated and  
19 reported with 95% confidence interval. Meta-analysis will be visually represented with forest  
20 plot. We assume possibility of heterogeneity owing to differences in study design or analysis,  
21 intervention, type of insurance and other contextual factors. If there exist heterogeneity due to  
22 aforementioned components, we will not perform meta-analysis. After ruling out clinical or  
23 methodological heterogeneity, we will statistically measure heterogeneity by using  $I^2$  test. If  
24 significant heterogeneity (>50%) persists for a particular outcome, meta-analysis will not be  
25 conducted. In this case our focus would be on conducting narrative synthesis and undertaking  
26 a subgroup analysis. Key finding of studies will be summarized in tables/ figures or vote  
27 counting will be considered. Subgroups could be based on study design, intervention type,  
28 insurance type (such as private and public), region and other contextual factors (e.g.,  
29 urban/rural).  
30  
31  
32  
33  
34  
35  
36  
37  
38  
39  
40  
41  
42  
43  
44  
45  
46  
47  
48  
49

#### 50 2. Qualitative synthesis:

51  
52 We will carry out thematic analysis as suggested by Thomas & Harden (2008).<sup>26</sup> An iterative  
53 process of line-by-line coding will be undertaken as a first step, which will be followed by  
54 categorizing the codes into code families. Subsequently, code tree will be created, and themes  
55  
56  
57  
58  
59  
60

1  
2  
3 and sub-themes will be generated. Three reviewers (SSP, ER, BTV) will code the data  
4  
5 independently and resolve the discrepancy by discussion until consensus.  
6

7  
8 3. Mixed methods synthesis:  
9

10 The result from both, qualitative and quantitative synthesis will be merged for each outcome.  
11  
12 Parallel synthesis will be carried out and findings will be summarized narratively.<sup>25</sup> To  
13  
14 understand the influence of inequality in uptake of health insurance based on type of insurance,  
15  
16 we will explore the possibility of conducting subgroup analysis based on some of the  
17  
18 components of PROGRESS-Plus framework.<sup>27</sup>  
19

20  
21 *Grading the evidence:*  
22

23  
24 We will use the GRADE approach to evaluate the certainty of evidence.<sup>21</sup> Using GRADE  
25  
26 profiler software, we will present the main findings of the systematic review in a summary of  
27  
28 findings table.  
29

30  
31 *Patient and public involvement:*  
32

33 We did not involve patients or public while designing and writing this protocol.  
34  
35

36  
37 **Ethics and Dissemination:**  
38

39 This review will be based on published studies therefore ethical clearance is not applicable.  
40  
41 We have planned following activities to communicate and disseminate the findings of this  
42  
43 review. We plan to make at least one national or international conference presentation. We will  
44  
45 prepare policy brief to be shared with funder and to get a wider reader, we plan to submit the  
46  
47 manuscript to a peer-reviewed journal. Upon journal publication, we intend to circulate the  
48  
49 findings through our social media platform and website.  
50  
51

52  
53 **Author contribution:**  
54

55  
56 Dr Reshmi B is the guarantor of the review. RB, SSP, ER, and BTV conceptualized the  
57  
58 manuscript. SSP drafted the first manuscript, which was further edited by ER. RV developed  
59  
60



1  
2  
3 the search strategy. All the authors (RB, UB, SSP, ER, RV and BTV) read, edited, provided  
4  
5 feedback and approved the final manuscript.  
6  
7

### 8 9 **Funding statement:**

10 This work was supported by PHRI-RESEARCH grants awarded by PHFI with the financial  
11  
12 support of Department of Science and Technology (DST). We appreciate the technical support  
13  
14 provided by public Health Evidence South Asia, Prasanna School of Public Health, Manipal  
15  
16 Academy of Higher Education, Manipal. Funder did not have any role in writing this protocol  
17  
18 and decision to submit it for publication.  
19  
20  
21  
22

23  
24 **Competing interest:** Authors do not have any competing interest.  
25

### 26 **References**

- 27  
28  
29  
30  
31 1. Basaza R, Kyasiimire EP, Namyalo PK, et al. Willingness to pay for Community Health  
32  
33 Insurance among taxi drivers in Kampala City, Uganda: a contingent evaluation. *Risk*  
34  
35 *Manag Healthc Policy* 2019;12:133-43. doi: 10.2147/RMHP.S184872  
36  
37  
38 2. Mirach TH, Demissie GD, Biks GA. Determinants of community-based health insurance  
39  
40 implementation in west Gojjam zone, Northwest Ethiopia: a community based cross  
41  
42 sectional study design. *BMC Health Services Research* 2019;19(1):544. doi:  
43  
44 10.1186/s12913-019-4363-z  
45  
46  
47 3. Myint CY, Pavlova M, Groot W. Health insurance in Myanmar: Knowledge, perceptions,  
48  
49 and preferences of Social Security Scheme members and general adult population. *The*  
50  
51 *International journal of health planning and management* 2019;34(1):346-69. doi:  
52  
53 10.1002/hpm.2643  
54  
55  
56  
57  
58  
59  
60

- 1  
2  
3 4. Ogundeji YK, Akomolafe B, Ohiri K, et al. Factors influencing willingness and ability to  
4  
5 pay for social health insurance in Nigeria. *PLoS One* 2019;14(8):e0220558-e58. doi:  
6  
7 10.1371/journal.pone.0220558  
8  
9
- 10 5. Surendar R AM, Madhumadhi S, Saravanan R, Karrunya S, Srikanth S. Awareness on Health  
11  
12 Insurance among a selected Urban Population in Puducherry. *Nat J Res Community*  
13  
14 *Med* 2019;8(2):176-79.  
15  
16
- 17 6. Okoroh J, Essoun S, Seddoh A, et al. Evaluating the impact of the national health insurance  
18  
19 scheme of Ghana on out of pocket expenditures: a systematic review. *BMC Health Serv*  
20  
21 *Res* 2018;18(1):426. doi: 10.1186/s12913-018-3249-9  
22  
23
- 24 7. Kuwawenaruwa A, Ramsey K, Binyaruka P, et al. Implementation and effectiveness of free  
25  
26 health insurance for the poor pregnant women in Tanzania: A mixed methods  
27  
28 evaluation. *Social Science & Medicine* 2019;225:17-25. doi:  
29  
30 <https://doi.org/10.1016/j.socscimed.2019.02.005>  
31  
32
- 33 8. van Hees SGM, O'Fallon T, Hofker M, et al. Leaving no one behind? Social inclusion of  
34  
35 health insurance in low- and middle-income countries: a systematic review.  
36  
37 *International Journal for Equity in Health* 2019;18(1):134. doi: 10.1186/s12939-019-  
38  
39 1040-0  
40  
41
- 42 9. Kanmiki EW, Bawah AA, Akazili J, et al. Unawareness of health insurance expiration status  
43  
44 among women of reproductive age in Northern Ghana: implications for achieving  
45  
46 universal health coverage. *Journal of Health, Population and Nutrition* 2019;38(1):34.  
47  
48 doi: 10.1186/s41043-019-0190-4  
49  
50
- 51 10. Fadlallah R, El-Jardali F, Hemadi N, et al. Barriers and facilitators to implementation,  
52  
53 uptake and sustainability of community-based health insurance schemes in low- and  
54  
55 middle-income countries: a systematic review. *International journal for equity in*  
56  
57 *health* 2018;17(1):13-13. doi: 10.1186/s12939-018-0721-4  
58  
59  
60

- 1  
2  
3 11. Maurya D, Mintrom M. Policy entrepreneurs as catalysts of broad system change: the case  
4  
5 of social health insurance adoption in India. *Journal of Asian Public Policy*  
6  
7 2020;13(1):18-34. doi: 10.1080/17516234.2019.1617955  
8  
9
- 10 12. Lagomarsino G, Garabrant A, Adyas A, et al. Moving towards universal health coverage:  
11  
12 health insurance reforms in nine developing countries in Africa and Asia. *The Lancet*  
13  
14 2012;380(9845):933-43. doi: 10.1016/S0140-6736(12)61147-7  
15  
16
- 17 13. Garg S, Bebarta KK, Tripathi N. Performance of India's national publicly funded health  
18  
19 insurance scheme, Pradhan Mantri Jan Arogya Yojana (PMJAY), in improving access  
20  
21 and financial protection for hospital care: findings from household surveys in  
22  
23 Chhattisgarh state. *BMC Public Health* 2020;20(1):949. doi: 10.1186/s12889-020-  
24  
25 09107-4  
26  
27
- 28 14. Key Indicators of Social Consumption in India Health: Government of India, Ministry of  
29  
30 Statistics and Programme Implementation, 2014.  
31  
32
- 33 15. Abiola AO, Ladi-Akinyemi TW, Oyeleye OA, et al. Knowledge and utilisation of National  
34  
35 Health Insurance Scheme among adult patients attending a tertiary health facility in  
36  
37 Lagos State, South-Western Nigeria. *Afr J Prim Health Care Fam Med* 2019;11(1):e1-  
38  
39 e7. doi: 10.4102/phcfm.v11i1.2018  
40  
41
- 42 16. Seddoh A, Sataru F. Mundane? Demographic characteristics as predictors of enrolment  
43  
44 onto the National Health Insurance Scheme in two districts of Ghana. *BMC Health*  
45  
46 *Services Research* 2018;18(1):330. doi: 10.1186/s12913-018-3155-1  
47  
48
- 49 17. Michael GC, Aliyu I, Grema BA, et al. Perception of Factors Influencing Primary Health-  
50  
51 Care Facility Choice Among National Health Insurance Enrollees of a Northwest  
52  
53 Nigerian Hospital. *J Patient Exp* 2019;6(3):247-52. doi: 10.1177/2374373518790072  
54  
55
- 56 18. Ayanore MA, Pavlova M, Kugbey N, et al. Health insurance coverage, type of payment for  
57  
58 health insurance, and reasons for not being insured under the National Health Insurance  
59  
60

- 1  
2  
3 Scheme in Ghana. *Health Economics Review* 2019;9(1):39. doi: 10.1186/s13561-019-  
4 0255-5  
5  
6  
7
- 8 19. Ghaddar S, Byun J, Krishnaswami J. Health insurance literacy and awareness of the  
9 Affordable Care Act in a vulnerable Hispanic population. *Patient education and*  
10 *counseling* 2018;101(12):2233-40. doi: 10.1016/j.pec.2018.08.033  
11  
12  
13  
14
- 15 20. Prinja S, Chauhan AS, Karan A, et al. Impact of Publicly Financed Health Insurance  
16 Schemes on Healthcare Utilization and Financial Risk Protection in India: A Systematic  
17 Review. *PLoS One* 2017;12(2):e0170996-e96. doi: 10.1371/journal.pone.0170996  
18  
19  
20  
21
- 22 21. Cochrane Handbook for Systematic Reviews of Interventions version 6.1 (updated  
23 September 2020). In: Higgins JPT, Thomas J, Chandler J, et al., eds.: Cochrane, 2020.  
24  
25
- 26 22. Moher D, Liberati A, Tetzlaff J, et al. Preferred reporting items for systematic reviews and  
27 meta-analyses: the PRISMA statement. *PLoS medicine* 2009;6(7):e1000097. doi:  
28 10.1371/journal.pmed.1000097  
29  
30  
31  
32
- 33 23. Quality Assessment Tool For Quantitative Studies Hamilton, ON: Effective Public Health  
34 Practice Project; 1998 [Available from: [https://www.nccmt.ca/knowledge-](https://www.nccmt.ca/knowledge-repositories/search/14)  
35 [repositories/search/14](https://www.nccmt.ca/knowledge-repositories/search/14) accessed December 10 2020.  
36  
37  
38  
39
- 40 24. Wells GA, Shea B, O'Connell D, et al. The Newcastle-Ottawa Scale (NOS) for assessing  
41 the quality of nonrandomised studies in meta-analyses: Ottawa Hospital Research  
42 Institute; 2019 [Available from:  
43 [http://www.ohri.ca/programs/clinical\\_epidemiology/oxford.asp](http://www.ohri.ca/programs/clinical_epidemiology/oxford.asp) accessed December 12  
44  
45  
46  
47  
48  
49  
50
- 51 25. Panda P, Dror I, Koehlmoos T, et al. What factors affect take up of voluntary and  
52 community based health insurance programmes in low- and middle- income countries?  
53 A systematic review (Protocol). London: EPPI-Centre, Social Science Research Unit,  
54 Institute of Education, University of London, 2013.  
55  
56  
57  
58  
59  
60

- 1  
2  
3 26. Thomas J, Harden A. Methods for the thematic synthesis of qualitative research in  
4  
5 systematic reviews. *BMC Medical Research Methodology* 2008;8(1):45. doi:  
6  
7 10.1186/1471-2288-8-45  
8  
9  
10 27. Oliver S, Kavanagh J, Caird J, et al. Health promotion, inequalities and young people's  
11  
12 health. A systematic review of research. London: EPPI-Centre, Social Science  
13  
14 Research Unit, Institute of Education, University of London, 2008.  
15  
16  
17  
18  
19  
20  
21  
22  
23  
24  
25  
26  
27  
28  
29  
30  
31  
32  
33  
34  
35  
36  
37  
38  
39  
40  
41  
42  
43  
44  
45  
46  
47  
48  
49  
50  
51  
52  
53  
54  
55  
56  
57  
58  
59  
60

**PRISMA-P (Preferred Reporting Items for Systematic review and Meta-Analysis Protocols) 2015 checklist: recommended items to address in a systematic review protocol\***

| Section and topic                 | Item No | Checklist item                                                                                                                                                                                  | Response (Yes or No) | Page number |
|-----------------------------------|---------|-------------------------------------------------------------------------------------------------------------------------------------------------------------------------------------------------|----------------------|-------------|
| <b>ADMINISTRATIVE INFORMATION</b> |         |                                                                                                                                                                                                 |                      |             |
| Title:                            |         |                                                                                                                                                                                                 |                      |             |
| Identification                    | 1a      | Identify the report as a protocol of a systematic review                                                                                                                                        | Yes                  | 1           |
| Update                            | 1b      | If the protocol is for an update of a previous systematic review, identify as such                                                                                                              | Not applicable (NA)  |             |
| Registration                      | 2       | If registered, provide the name of the registry (such as PROSPERO) and registration number                                                                                                      | No                   |             |
| Authors:                          |         |                                                                                                                                                                                                 |                      |             |
| Contact                           | 3a      | Provide name, institutional affiliation, e-mail address of all protocol authors; provide physical mailing address of corresponding author                                                       | Yes                  | 1           |
| Contributions                     | 3b      | Describe contributions of protocol authors and identify the guarantor of the review                                                                                                             | Yes                  | 25          |
| Amendments                        | 4       | If the protocol represents an amendment of a previously completed or published protocol, identify as such and list changes; otherwise, state plan for documenting important protocol amendments | NA                   |             |
| Support:                          |         |                                                                                                                                                                                                 |                      |             |
| Sources                           | 5a      | Indicate sources of financial or other support for the review                                                                                                                                   | Yes                  | 25          |
| Sponsor                           | 5b      | Provide name for the review funder and/or sponsor                                                                                                                                               | Yes                  | 25          |
| Role of sponsor or funder         | 5c      | Describe roles of funder(s), sponsor(s), and/or institution(s), if any, in developing the protocol                                                                                              | Yes                  | 25          |
| <b>INTRODUCTION</b>               |         |                                                                                                                                                                                                 |                      |             |
| Rationale                         | 6       | Describe the rationale for the review in the context of what is already known                                                                                                                   | Yes                  | 8           |
| Objectives                        | 7       | Provide an explicit statement of the question(s) the review will address with reference to participants, interventions, comparators, and outcomes (PICO)                                        | Yes                  | 8           |
| <b>METHODS</b>                    |         |                                                                                                                                                                                                 |                      |             |

|                                    |     |                                                                                                                                                                                                                                                  |     |                  |
|------------------------------------|-----|--------------------------------------------------------------------------------------------------------------------------------------------------------------------------------------------------------------------------------------------------|-----|------------------|
| Eligibility criteria               | 8   | Specify the study characteristics (such as PICO, study design, setting, time frame) and report characteristics (such as years considered, language, publication status) to be used as criteria for eligibility for the review                    | Yes | 9-10             |
| Information sources                | 9   | Describe all intended information sources (such as electronic databases, contact with study authors, trial registers or other grey literature sources) with planned dates of coverage                                                            | Yes | 11               |
| Search strategy                    | 10  | Present draft of search strategy to be used for at least one electronic database, including planned limits, such that it could be repeated                                                                                                       | Yes | 11, & table 1    |
| Study records:                     |     |                                                                                                                                                                                                                                                  |     |                  |
| Data management                    | 11a | Describe the mechanism(s) that will be used to manage records and data throughout the review                                                                                                                                                     | Yes | 15               |
| Selection process                  | 11b | State the process that will be used for selecting studies (such as two independent reviewers) through each phase of the review (that is, screening, eligibility and inclusion in meta-analysis)                                                  | Yes | 15-16, & table 2 |
| Data collection process            | 11c | Describe planned method of extracting data from reports (such as piloting forms, done independently, in duplicate), any processes for obtaining and confirming data from investigators                                                           | Yes | 21               |
| Data items                         | 12  | List and define all variables for which data will be sought (such as PICO items, funding sources), any pre-planned data assumptions and simplifications                                                                                          | Yes | 21, & table 3    |
| Outcomes and prioritization        | 13  | List and define all outcomes for which data will be sought, including prioritization of main and additional outcomes, with rationale                                                                                                             | Yes | 9-10             |
| Risk of bias in individual studies | 14  | Describe anticipated methods for assessing risk of bias of individual studies, including whether this will be done at the outcome or study level, or both; state how this information will be used in data synthesis                             | Yes | 22-23            |
| Data synthesis                     | 15a | Describe criteria under which study data will be quantitatively synthesised                                                                                                                                                                      | Yes | 23-24            |
|                                    | 15b | If data are appropriate for quantitative synthesis, describe planned summary measures, methods of handling data and methods of combining data from studies, including any planned exploration of consistency (such as $I^2$ , Kendall's $\tau$ ) | Yes | 23-24            |
|                                    | 15c | Describe any proposed additional analyses (such as sensitivity or subgroup analyses, meta-regression)                                                                                                                                            | Yes | 23-24            |
|                                    | 15d | If quantitative synthesis is not appropriate, describe the type of summary planned                                                                                                                                                               | Yes | 24               |
| Meta-bias(es)                      | 16  | Specify any planned assessment of meta-bias(es) (such as publication bias across                                                                                                                                                                 | No  |                  |

1  
2  
3  
4  
5  
6  
7  
8  
9  
10  
11  
12  
13  
14  
15  
16  
17  
18  
19  
20  
21  
22  
23  
24  
25  
26  
27  
28  
29  
30  
31  
32  
33  
34  
35  
36  
37  
38  
39  
40  
41  
42  
43  
44  
45  
46

|                                   |    |                                                                                    |     |    |
|-----------------------------------|----|------------------------------------------------------------------------------------|-----|----|
|                                   |    | studies, selective reporting within studies)                                       |     |    |
| Confidence in cumulative evidence | 17 | Describe how the strength of the body of evidence will be assessed (such as GRADE) | Yes | 24 |

**\* It is strongly recommended that this checklist be read in conjunction with the PRISMA-P Explanation and Elaboration (cite when available) for important clarification on the items. Amendments to a review protocol should be tracked and dated. The copyright for PRISMA-P (including checklist) is held by the PRISMA-P Group and is distributed under a Creative Commons Attribution Licence 4.0.**

*From: Shamseer L, Moher D, Clarke M, Ghersi D, Liberati A, Petticrew M, Shekelle P, Stewart L, PRISMA-P Group. Preferred reporting items for systematic review and meta-analysis protocols (PRISMA-P) 2015: elaboration and explanation. BMJ. 2015 Jan 2;349(jan02 1):g7647.*



# BMJ Open

## Health insurance awareness and its uptake in India: a systematic review protocol

|                                 |                                                                                                                                                                                                                                                                                                                                                                                                                                                                                                                                                                                                                                                                                                                                                                                                                                                         |
|---------------------------------|---------------------------------------------------------------------------------------------------------------------------------------------------------------------------------------------------------------------------------------------------------------------------------------------------------------------------------------------------------------------------------------------------------------------------------------------------------------------------------------------------------------------------------------------------------------------------------------------------------------------------------------------------------------------------------------------------------------------------------------------------------------------------------------------------------------------------------------------------------|
| Journal:                        | <i>BMJ Open</i>                                                                                                                                                                                                                                                                                                                                                                                                                                                                                                                                                                                                                                                                                                                                                                                                                                         |
| Manuscript ID                   | bmjopen-2020-043122.R2                                                                                                                                                                                                                                                                                                                                                                                                                                                                                                                                                                                                                                                                                                                                                                                                                                  |
| Article Type:                   | Protocol                                                                                                                                                                                                                                                                                                                                                                                                                                                                                                                                                                                                                                                                                                                                                                                                                                                |
| Date Submitted by the Author:   | 01-Mar-2021                                                                                                                                                                                                                                                                                                                                                                                                                                                                                                                                                                                                                                                                                                                                                                                                                                             |
| Complete List of Authors:       | B, Reshmi; Manipal Academy of Higher Education, Health Information Management, Manipal College of Health Professionals<br>Unnikrishnan, B.; Manipal Academy of Higher Education, Kasturba Medical College<br>Parsekar, Shradha; Manipal Academy of Higher Education, Public Health Evidence South Asia, Department of Health Information, Prasanna School of Public Health (PSPH), Manipal Academy of Higher Education<br>Rajwar, Eti; Manipal Academy of Higher Education, Public Health Evidence South Asia, Department of health informatics, Prasanna School of Public Health,<br>Vijayamma, Ratheebhai; Manipal Academy of Higher Education, Manipal Institute of Communication<br>VENKATESH, BHUMIKA; Manipal Academy of Higher Education, Public Health Evidence South Asia, Department of health informatics, Prasanna School of Public Health, |
| <b>Primary Subject Heading</b>: | Health policy                                                                                                                                                                                                                                                                                                                                                                                                                                                                                                                                                                                                                                                                                                                                                                                                                                           |
| Secondary Subject Heading:      | Public health                                                                                                                                                                                                                                                                                                                                                                                                                                                                                                                                                                                                                                                                                                                                                                                                                                           |
| Keywords:                       | Health economics < HEALTH SERVICES ADMINISTRATION & MANAGEMENT, Health policy < HEALTH SERVICES ADMINISTRATION & MANAGEMENT, Public health < INFECTIOUS DISEASES                                                                                                                                                                                                                                                                                                                                                                                                                                                                                                                                                                                                                                                                                        |
|                                 |                                                                                                                                                                                                                                                                                                                                                                                                                                                                                                                                                                                                                                                                                                                                                                                                                                                         |

SCHOLARONE™  
Manuscripts



I, the Submitting Author has the right to grant and does grant on behalf of all authors of the Work (as defined in the below author licence), an exclusive licence and/or a non-exclusive licence for contributions from authors who are: i) UK Crown employees; ii) where BMJ has agreed a CC-BY licence shall apply, and/or iii) in accordance with the terms applicable for US Federal Government officers or employees acting as part of their official duties; on a worldwide, perpetual, irrevocable, royalty-free basis to BMJ Publishing Group Ltd ("BMJ") its licensees and where the relevant Journal is co-owned by BMJ to the co-owners of the Journal, to publish the Work in this journal and any other BMJ products and to exploit all rights, as set out in our [licence](#).

The Submitting Author accepts and understands that any supply made under these terms is made by BMJ to the Submitting Author unless you are acting as an employee on behalf of your employer or a postgraduate student of an affiliated institution which is paying any applicable article publishing charge ("APC") for Open Access articles. Where the Submitting Author wishes to make the Work available on an Open Access basis (and intends to pay the relevant APC), the terms of reuse of such Open Access shall be governed by a Creative Commons licence – details of these licences and which [Creative Commons](#) licence will apply to this Work are set out in our licence referred to above.

Other than as permitted in any relevant BMJ Author's Self Archiving Policies, I confirm this Work has not been accepted for publication elsewhere, is not being considered for publication elsewhere and does not duplicate material already published. I confirm all authors consent to publication of this Work and authorise the granting of this licence.

## Health insurance awareness and its uptake in India: a systematic review protocol

Reshmi B.<sup>1a</sup>, Unnikrishnan B.<sup>2b</sup>, Shradha S. Parsekar<sup>3c</sup>, Eti Rajwar<sup>3d</sup>, Ratheebhai V.<sup>4e</sup>,

Bhumika T.V.<sup>3f\*</sup>

### Affiliations:

<sup>1</sup> Health Information Management, Manipal College of Health Professionals, Manipal Academy of Higher Education (MAHE), Manipal, India

<sup>2</sup> Department of Community Medicine, Kasturba Medical College, MAHE, Mangaluru, India

<sup>3</sup> Public Health Evidence South Asia, Prasanna School of Public Health, MAHE, Manipal, India

<sup>4</sup> Manipal School of Communication, MAHE, Manipal, India

### \*Corresponding author:

Room No. 35 Public Health Evidence South Asia, Prasanna School of Public health, MAHE, Manipal 576104, Karnataka, India; Telephone: 08202923449 Email:

[bhumika.tv@manipal.edu](mailto:bhumika.tv@manipal.edu)

**Word count:** 4352 (inclusive of tables but exclusive of references, title page, abstract, and strengths and limitation)

**Abstract:**

Introduction: Health insurance is one of the important approaches that can help in boosting universal healthcare coverage through improved healthcare utilization and financial protection.

This objectives of this review are to identify various interventions implemented in India to promote awareness of health insurance, and to provide evidence for the effectiveness of such interventions on the awareness and uptake of health insurance by the resident Indian population.

Methods and analysis: A systematic review will be carried out based on the Cochrane handbook for systematic reviews of interventions. The review will include experimental and analytical observational studies that have included adult population ( $\geq 18$  years) in India. We will include any intervention, policy or program that directly or indirectly affects awareness or uptake of health insurance. The following outcomes will be eligible to be included: awareness or health insurance literacy, attitude such as readiness to buy health insurance or decision making, uptake of health insurance, demand- and supply-side factors for awareness of health insurance, and awareness as a factor for uptake and re-enrolment in health insurance. Databases such as MEDLINE (PubMed), Web of Science, Scopus, 3ie impact evaluation repository and SSRN will be searched from January 2010 to July 15, 2020. Additionally, important government websites and references of the included studies will be scanned to identify potential records. Three authors, independently, will carry out screening and data extraction. Studies will be categorized into quantitative and qualitative, and mixed methods synthesis will be employed to analyze the findings.

Ethics and dissemination: This review will be based on published studies and will not recruit human participants directly, therefore, ethical clearance is not applicable. We will disseminate the final review findings in a national or international conference and publish in a peer-reviewed journal.

1  
2  
3 **Key words:** Awareness; Health Insurance; Healthcare services; India; Protocol  
4  
5

6 **Strengths and limitation of the review**  
7

- 8
- 9 • This systematic review will use mixed methods analysis involving findings from  
10 quantitative and qualitative studies conducted in India.  
11
  - 12 • We will comprehensively search the evidence in various databases, gray literature, and  
13 reference and forward citations of included studies, however, the publications will be  
14 restricted to English.  
15
  - 16 • We anticipate heterogeneity owing to study designs of potentially included studies,  
17 however, to mitigate this challenge we have planned to conduct sub-group analysis  
18 based on PROGRESS-Plus framework.  
19  
20  
21  
22  
23  
24  
25  
26  
27  
28  
29  
30  
31  
32  
33  
34  
35  
36  
37  
38  
39  
40  
41  
42  
43  
44  
45  
46  
47  
48  
49  
50  
51  
52  
53  
54  
55  
56  
57  
58  
59  
60

## Introduction

Low- and middle-income countries (LMICs) contribute to around 84% of the world population and 90% of the global burden of disease.<sup>1</sup> People living in the LMICs rely majorly on out-of-pocket (OOP) payments as the prime source for managing healthcare expenses, that results in a massive demand for services and financial burden of households (usually catastrophic), which in turn leads to impoverishment.<sup>1-5</sup> It is projected that every year approximately 150 million people experience financial catastrophe, by spending more than 40% on health expenses other than food.<sup>6</sup> Families generally spend more than 10 % of the household income on illness-related expenses, due to which other household expenses are affected.<sup>2, 5</sup> To make it worse, evidence suggests that per capita spending on healthcare in many LMICs is expected to increase in coming years.<sup>4</sup> Additionally, the increased costs of seeking and receiving care can hinder the access to healthcare.<sup>7</sup>

The Universal Health Coverage (UHC) is embedded within the sustainable development goals (SDGs) and aims “to ensure healthy lives and promote well-being for all at all ages by 2030”.<sup>8</sup> It includes financial risk protection and equal access to quality essential healthcare services.<sup>8,9</sup> In other terms, UHC encourages equitable healthcare<sup>2</sup> and nations across the world are committed to achieving SDGs through UHC.<sup>10</sup>

Health insurance is one of the important approaches that can help in boosting UHC through improved healthcare utilization and financial protection.<sup>7-9, 11</sup> There are multiple types of insurance in LMICs that differ with providers (government vs private sector), scales, and types of beneficiaries.<sup>8</sup> However, in many LMICs, due lack of acceptability and unwillingness to pay premiums, health insurance coverage is limited.<sup>2, 4</sup> This increases the risk of excluding vulnerable and at-risk population, who cannot afford to pay health insurance premium.<sup>8</sup> Additionally, the older adults, and the individuals with disability and chronic diseases, have

1  
2  
3 less probability of enrolling in health insurance schemes or their specific needs may not be  
4 covered under the scheme.<sup>8</sup>  
5  
6

7  
8  
9 The coverage of health insurance policies or programs in India is improving, however, the  
10 publicly-funded health insurance schemes are mostly restricted to socio-economically  
11 backward people or government employees.<sup>12</sup> India's first health insurance program, launched  
12 in the 1950s, was limited to central government employees and certain low-income  
13 population.<sup>11</sup> Over the years, the private healthcare providers' dominance in quality healthcare  
14 service provision can be seen.<sup>11</sup> Nevertheless, many economically backward families are either  
15 deprived of healthcare or are pushed into poverty in the absence of financial protection.<sup>11</sup> In  
16 2002, targeted health insurance programs for low-income households were introduced by  
17 central and state governments in partnership with private sector and non-governmental  
18 organizations (NGO). Since 2002 (recommendations of National Health Policy 2002), more  
19 than 17 health insurance schemes have been launched by various governments in India.<sup>11</sup> The  
20 most recent one is 'Ayushman Bharat' or Pradhan Mantri Jan Arogya Yojana (PMJAY) (Prime  
21 minister's health assurance scheme) launched in 2018 to achieve UHC. PMJAY is fully  
22 financed by the government and seeks to cover 500 million citizens with an annual cover of  
23 approximately 7000 USD per household. The main aim of the PMJAY is to lessen the  
24 economic burden experienced by poor and vulnerable groups for access to healthcare facility.<sup>13</sup>  
25  
26  
27  
28  
29  
30  
31  
32  
33  
34  
35  
36  
37  
38  
39  
40  
41  
42  
43  
44  
45

46 Despite the availability of multiple health insurance schemes, evidence suggests that the uptake  
47 of health insurance in India is poor. As per the recently concluded National Sample Survey  
48 Office (NSSO) data, there were as low as 14% rural and 18 % urban residents of India having  
49 some form of health insurance.<sup>14</sup> The low coverage of health insurance was evident in other  
50 literature, wherein it was reported to be less than 20%.<sup>5, 12</sup> Similarly, other LMICs have reported  
51 poor registrations in the national health insurance schemes.<sup>8, 9, 12, 15</sup>  
52  
53  
54  
55  
56  
57  
58  
59  
60

1  
2  
3 There are multiple factors that are responsible for awareness and enrolment in health insurance  
4 schemes.<sup>2, 4</sup> These factors can be broadly divided into individual (age, gender, education,  
5 employment status, marital status),<sup>2, 9, 16</sup> and household characteristics (wealth, size of  
6 family).<sup>1, 9, 17</sup> Other factors are program-related (premium amount, rules, regulation, and  
7 procedures), social capital (trust, networks and group participation, social norms, and solidarity  
8 and togetherness features of the social organization of the community), institutional factors  
9 (regulatory mechanisms, complaint handling systems, and insurance education), and supply  
10 side factors (quality of care and distance of house from the nearest health facility).<sup>2</sup> The  
11 aforementioned factors may also determine the consumer preference in selecting the health  
12 insurance.<sup>17</sup> Inadequate claim returns, poor accountability and non-transparent operations  
13 hinders the uptake of health insurance.<sup>18</sup>

14  
15  
16  
17  
18  
19  
20  
21  
22  
23  
24  
25  
26  
27  
28  
29  
30  
31  
32  
33  
34  
35  
36  
37  
38  
39  
40  
41  
42  
43  
44  
45  
46  
47  
48  
49  
50  
51  
52  
53  
54  
55  
56  
57  
58  
59  
60  
In Indian studies, a scant i.e. 34 % of the participants who did not have health insurance were  
willing to pay for any health insurance.<sup>5</sup> Previous research in LMICs suggests that financial  
status of household is positively associated with willingness to pay (WTP).<sup>2, 4, 9, 18</sup> Whereas  
level of education received contradictory findings i.e. a study conducted in Nigeria reported  
that education was negatively associated with WTP<sup>4</sup> contrary to study conducted in Uganda,<sup>1</sup>  
Ghana,<sup>16</sup> and India.<sup>5</sup> Family who had good perceived health had less probability of getting  
insurance as compared to those individuals who perceived their health as poor. Similarly, those  
individuals who had chronic diseases were more inclined to have health insurance than those  
who did not have chronic diseases.<sup>2</sup> Corruption and mistrust in the health insurance scheme<sup>1, 5,</sup>  
<sup>18</sup> and expensive plans<sup>5, 18</sup> were some of the reasons for non-willingness to pay. Lack of  
information or health insurance illiteracy is another important reason for non-willingness to  
pay.<sup>1, 5, 18</sup>



1  
2  
3 Health insurance literacy is defined as “the degree to which individuals have the knowledge,  
4 ability, and confidence to find and evaluate information about health plans, select the best plan  
5 for their own (or their families) financial and health circumstances, and use the plan once  
6 enrolled.”<sup>1</sup> Lack of health insurance literacy or education hinders the uptake of health insurance  
7 and in many LMICs health insurance literacy is poor. A study conducted in Uganda reported  
8 that about 34% of the studied population were not aware of health insurance.<sup>1</sup> Whereas,  
9 proportion of people having inadequate knowledge about health insurance was found to be high  
10 in countries such as India (46%),<sup>5</sup> Myanmar (66%)<sup>3</sup> and Hispanic American in the United  
11 States (70%)<sup>19</sup>.

12  
13  
14  
15  
16  
17  
18  
19  
20  
21  
22  
23  
24  
25 Familiarity or awareness of the insurance schemes increases the utilization of health insurance  
26 and subsequently help in healthcare uptake.<sup>1, 2, 19</sup> Individuals usually enroll into health  
27 insurance because of their personal experiences, awareness, or word-of-mouth  
28 advertisements.<sup>17</sup> Mass media such as newspaper, radio and television play an important role  
29 in making people aware of health insurance schemes.<sup>1</sup> Friends, community meetings, school  
30 gatherings, and health workers have an influence on increasing the health insurance awareness  
31 of the people.<sup>1</sup> Although, aforesaid factors help in increasing the awareness and enrollment in  
32 health insurance scheme, some enrollees may not pay premium on regular basis and might not  
33 get to know even after health insurance is lapsed.<sup>9</sup> Women farmers, as compared to other  
34 occupations, had more odds of unawareness that their insurance was lapsed.<sup>9</sup>

35  
36  
37  
38  
39  
40  
41  
42  
43  
44  
45  
46  
47  
48  
49 It is evident from the above description that there is inadequate awareness of health insurance  
50 among general population in LMICs. Knowledge about health insurance can boost individuals’  
51 confidence and self-efficacy; thus, it is an important *a priori* factor that is required to get  
52 enrolled in health insurance scheme.<sup>19</sup> Outreach programs to increase general knowledge of  
53 health insurance and integrating health insurance education within health delivery systems may  
54  
55  
56  
57  
58  
59  
60

1  
2  
3 help to improve the uptake of health insurance.<sup>19</sup> Globally, there are different methods  
4 available to promote and raise awareness about different health insurance schemes. However,  
5  
6 India is a diverse country with a complex health system and numerous contextual factors. A  
7  
8 ‘one size fits all’ approach for any policy or intervention is not suitable for the country.  
9  
10 Therefore, it is imperative to understand the different approaches implemented to raise  
11  
12 awareness about health insurance in the country. Additionally, due to increased population and  
13  
14 a meagre public health spending on healthcare, it is important to understand if the resources  
15  
16 are being utilized appropriately. To ensure this, understanding the effectiveness of such policies  
17  
18 is essential, so that focus is directed towards the suitable interventions. ‘Ayushman Bharat  
19  
20 Scheme- PMJAY’ is implemented to ensure increased utilization of the healthcare facilities  
21  
22 with financial protection of the beneficiaries. The evidence available on the effectiveness of  
23  
24 the PMJAY scheme states no effect of the scheme on utilization of healthcare and financial  
25  
26 protection of enrolled beneficiaries<sup>13</sup>, however, this evidence is limited. Therefore, in the  
27  
28 Indian context, it is important to understand if awareness is a factor that has led to decreased  
29  
30 utilization of PMJAY or failure of the other schemes (viz. Rashtriya Swasthya Bima Yojana-  
31  
32 RSBY) in securing financial protection of the beneficiaries.<sup>20</sup> Also, it is vital to understand the  
33  
34 importance of awareness programs for success of the health insurance schemes, which will be  
35  
36 the focus of this review.  
37  
38  
39  
40  
41  
42  
43  
44

45 A systematic review will help in synthesizing high quality evidence in a systematic manner,  
46  
47 for this important topic of interest. The proposed systematic review will therefore identify the  
48  
49 different approaches and interventions for increasing health insurance awareness in India and  
50  
51 will give information about the impact of these interventions. This review is planned to address  
52  
53 the following research questions:  
54  
55

56  
57 1. What are the various interventions implemented in India to promote awareness of health  
58  
59 insurance?  
60

1  
2  
3 2. What is the effectiveness of the above interventions on the awareness and uptake of health  
4 insurance by people of India?  
5  
6  
7

### 8 **Methods and analysis**

9  
10  
11 Methodology for this systematic review will be based on the Cochrane handbook for systematic  
12 reviews of interventions<sup>21</sup> and we have adhered to PRISMA-P guidelines for reporting this  
13 protocol.<sup>22</sup>  
14  
15  
16  
17

#### 18 *Criteria for including studies in the review:*

19  
20  
21 Population: The review will include studies conducted in India that involve adult population  
22 ( $\geq 18$  years). We will consider the studies having household as a unit of analysis, if the head of  
23 the family (or the family member who was interviewed) is an adult.  
24  
25  
26  
27

28  
29 Intervention/ Exposure: We will include any intervention, policy or program that directly or  
30 indirectly affects awareness of health insurance. The health insurance scheme could be of any  
31 type, including but not limited to, public, private, for profit and not-for-profit. Contribution for  
32 premiums could be made by individual, NGO, employer or government. There is no restriction  
33 on focus of health insurance e.g., hospital stay, surgery or critical illness.  
34  
35  
36  
37  
38  
39

40  
41 Intervention/ exposure could be educational, informative, training, technology and m-health or  
42 e-health related. The interventions could be focused on raising income threshold to be eligible  
43 for health insurance, such as, conditional or unconditional cash transfers that indirectly  
44 influences awareness of health insurance. Similarly, training and performance-based financing  
45 for healthcare staff or other groups will be eligible for inclusion. The intervention could be a  
46 modification of the enrolment procedure, changes in the premium or organizational changes in  
47 handling health insurance. Intervention could be directed on general population or targeted  
48  
49  
50  
51  
52  
53  
54  
55  
56  
57  
58  
59  
60

1  
2  
3 groups such as vulnerable population, indigenous groups, community leaders, employees,  
4 formal or informal groups and healthcare staff.  
5  
6  
7

8  
9 Comparison: This review will not restrict the studies based on comparison, as having a  
10 comparison group may not always be feasible.  
11  
12  
13

14 Outcomes:

- 15  
16  
17 i. Awareness/ health insurance literacy (refers to knowledge of the household head or  
18 household member on the presence of insurance schemes, its principles, and  
19 significance. The outcome measure can be objective or subjective.)  
20  
21  
22  
23 ii. Attitude: Readiness to buy health insurance, decision making  
24  
25  
26 iii. Uptake of health insurance  
27  
28  
29 iv. Demand- and supply-side factors for awareness of health insurance  
30  
31 v. Awareness of health insurance as a factor for uptake or re-enrolment of health  
32 insurance  
33  
34  
35

36 Types of study designs: This review will include experimental studies that assessed the effect  
37 of intervention to promote awareness and uptake of health insurance. It is sometimes not  
38 practical to conduct randomized controlled trials (RCTs) to measure the effect of public health  
39 interventions, therefore, the review will also include other study designs. Studies with  
40 following designs will be included: RCTs, interrupted time-series studies, difference-in-  
41 difference, regression discontinuity designs, statistical matching, quasi-randomized and non-  
42 randomized trials. Additionally, this review will include prospective, retrospective, analytical  
43 cross-sectional and studies related to process evaluation and policy analysis, if the studies have  
44 provided description of intervention or exposure of our interest. Qualitative studies are  
45 important source of information about barriers and enabling factors that can complement the  
46 findings, therefore we will also include these types of studies. This review will exclude  
47  
48  
49  
50  
51  
52  
53  
54  
55  
56  
57  
58  
59  
60

descriptive cross-sectional (prevalence) studies, commentaries, perspectives, editorials, reviews, and conference abstracts. Policy papers that do not provide details of implementation of intervention, will not be considered.

#### *Searching and locating the studies:*

The electronic databases such as MEDLINE (PubMed), Web of Science, and Scopus will be searched to identify potential records. Additionally, 3ie impact evaluation repository and SSRN (Social science research network) will be searched. Databases will be searched from January 2010 till July 15, 2020 and publications will be restricted to English language. Ministry of Health and Family Welfare, RSBY, Ayushman Bharat, and other state health insurance websites will be searched for reports on the health insurance schemes. We will also scan through references of the included studies for any additional eligible records. After identifying the keywords, initial search will be carried out in PubMed, which will then be replicated in other databases. A designated information scientist will be responsible for conducting search. The preliminary search concepts and key terms are given in table 1.

**Table 1: Search concepts and key words**

| Concept                  | Key terms                                                                                                                                                                                                                                                                                                             |
|--------------------------|-----------------------------------------------------------------------------------------------------------------------------------------------------------------------------------------------------------------------------------------------------------------------------------------------------------------------|
| Intervention or Exposure | 'Information Education Communication', 'IEC', 'Mass Media', 'Television', 'Leaflet', 'Brochure', 'Flyer', 'Radio', 'Television', 'Advertisement', 'Behavioral change communication', Awareness program/ programme/ campaign/ initiatives / policy', 'Promotion', 'Marketing', 'Social media', 'E-health', 'M-health'. |

|                 |                                                                                                                                                                                                                                                                                                                                                                                                                                                                                                                                                                                                                                                                                                                                                                                                                                                                                                                                                                                                       |
|-----------------|-------------------------------------------------------------------------------------------------------------------------------------------------------------------------------------------------------------------------------------------------------------------------------------------------------------------------------------------------------------------------------------------------------------------------------------------------------------------------------------------------------------------------------------------------------------------------------------------------------------------------------------------------------------------------------------------------------------------------------------------------------------------------------------------------------------------------------------------------------------------------------------------------------------------------------------------------------------------------------------------------------|
| Insurance names | <p>‘Community insurance’, ‘Health insurance’, ‘Health insurance programs / programmes/ schemes’, ‘Health finance /financing’, ‘Healthcare reform’, ‘Insurance coverage’, ‘National health insurance’, ‘National health insurance scheme’, ‘Medical insurance’, ‘Micro health insurance’, ‘Public health insurance’, ‘Social insurance’, ‘Social protection’, ‘Universal healthcare’, ‘Universal health care’, ‘UHC’, ‘Ayushman Bharat’, ‘Pradhan Mantri Jan Arogya Yojana’, ‘PMJAY’, ‘Mukhyamantri Swasthya Bima Yojana’, ‘MSBY’, ‘Rashtriya Swasthya Bima Yojana’, ‘RSBY’, ‘Aarogysri’, ‘Rajiv Arogyabhagya’, ‘Rajiv Arogyashree health insurance’, ‘Rajiv Gandhi Jeevandayee Arogya Yojana’, ‘Yesasvini health insurance’, ‘Yashshvini Community based health insurance programme’, ‘Vajpayee Arogyashree’, ‘Biju Krushak Kalyan’, ‘Kalainagar’, ‘CHIS’, ‘Employee State Insurance Scheme’, ‘ESIS’, ‘Central Government Health Scheme’, ‘CGHS’, ‘Mediclaim’, ‘Deen Dayal Swasthya Seva Yojana’.</p> |
| Outcome         | <p>‘Awareness of health insurance’, ‘Health insurance literacy’, ‘Uptake of health insurance’, ‘Utilization of healthcare services’, ‘Enrolment under health insurance’, ‘Health insurance enrolment’, ‘Health insurance retention’, ‘Healthcare utilization’, ‘Medical service utilization’, ‘Readiness to buy health insurance’, ‘Decision making’, ‘Perceptions’, ‘Knowledge’, ‘Demand- and supply-side factors’, ‘factors’, ‘barriers’, ‘enablers’.</p>                                                                                                                                                                                                                                                                                                                                                                                                                                                                                                                                           |
| Region          | India                                                                                                                                                                                                                                                                                                                                                                                                                                                                                                                                                                                                                                                                                                                                                                                                                                                                                                                                                                                                 |

*Applying eligibility and screening the studies:*

The results of search will be imported to Endnote X7 reference manager software and duplicates will be removed. MS Excel spreadsheet will be used to screen the records. Based on inclusion and exclusion criteria, all the records will be subjected to two stage - title/abstract (T/A) and full text (FT) - screening process, independently by three (SSP, ER, BTV) reviewers (in pairs). Any disagreements between the reviewers will be resolved by discussion, and senior reviewer will be involved in decision making in case of disagreements between the reviewers. The reasons for excluding full texts will be documented and the PRISMA flow diagram will be provided. A detailed screening protocol will be used as a back-up document to aid the screening process. Table 2 gives detailed screening protocol.

**Table 2: Screening protocol**

| <b>1</b> | <b>Title and abstract screening</b>                                                  |                                                                                     |                                                                                           |
|----------|--------------------------------------------------------------------------------------|-------------------------------------------------------------------------------------|-------------------------------------------------------------------------------------------|
| <b>A</b> | Is the study published in English?<br>AND Is it published in the year 2000 or later? | If answer to both the components are “Yes”, Go to B                                 | If it is non-English or published before 2000 then Exclude the study                      |
| <b>B</b> | Is it a study conducted in India?                                                    | 1. If it is “Yes” OR<br>2. If it is not clearly stated, thus cannot decide, Go to C | If it is clearly stated that it is conducted elsewhere, but India, then Exclude the study |

|   |                                                                                                                                                                                                                                                                                                                                                                           |                                                                            |                                                                                                                                                                                                                                                                                                  |
|---|---------------------------------------------------------------------------------------------------------------------------------------------------------------------------------------------------------------------------------------------------------------------------------------------------------------------------------------------------------------------------|----------------------------------------------------------------------------|--------------------------------------------------------------------------------------------------------------------------------------------------------------------------------------------------------------------------------------------------------------------------------------------------|
| C | <p>Does study involve one of the following design or analysis: RCTs, interrupted time series studies, difference-in-difference, regression discontinuity designs, statistical matching, quasi-randomized and non-randomized trials, prospective, retrospective, and analytical cross-sectional studies and studies related to process evaluation and policy analysis.</p> | <p>If answer is “Yes” OR it is not clearly stated in abstract, Go to D</p> | <p>If the study is descriptive cross-sectional (or prevalence study) having single group OR if the publication is a commentary, perspective, editorial, reviews, conference abstracts OR policy paper that does not provide details of implementation of intervention:<br/>Exclude the study</p> |
|---|---------------------------------------------------------------------------------------------------------------------------------------------------------------------------------------------------------------------------------------------------------------------------------------------------------------------------------------------------------------------------|----------------------------------------------------------------------------|--------------------------------------------------------------------------------------------------------------------------------------------------------------------------------------------------------------------------------------------------------------------------------------------------|



|                                                                                                                                                                                                                                                                                                                                                             |                                                                                                                                                                                                                                                                                                                                                                                                                                                                                                                                                                                                                                                                                                                                                                        |                                                                                                                                                                                                        |                                 |
|-------------------------------------------------------------------------------------------------------------------------------------------------------------------------------------------------------------------------------------------------------------------------------------------------------------------------------------------------------------|------------------------------------------------------------------------------------------------------------------------------------------------------------------------------------------------------------------------------------------------------------------------------------------------------------------------------------------------------------------------------------------------------------------------------------------------------------------------------------------------------------------------------------------------------------------------------------------------------------------------------------------------------------------------------------------------------------------------------------------------------------------------|--------------------------------------------------------------------------------------------------------------------------------------------------------------------------------------------------------|---------------------------------|
| 1<br>2<br>3<br>4<br>5<br>6<br>7<br>8<br>9<br>10<br>11<br>12<br>13<br>14<br>15<br>16<br>17<br>18<br>19<br>20<br>21<br>22<br>23<br>24<br>25<br>26<br>27<br>28<br>29<br>30<br>31<br>32<br>33<br>34<br>35<br>36<br>37<br>38<br>39<br>40<br>41<br>42<br>43<br>44<br>45<br>46<br>47<br>48<br>49<br>50<br>51<br>52<br>53<br>54<br>55<br>56<br>57<br>58<br>59<br>60 | <p><b>D</b> Does the study describe the intervention for increasing awareness of and uptake of health insurance?</p> <p>[The intervention could be any intervention, policy or program (e.g. Behavioral change communication or educational) that directly or indirectly affects awareness of health insurance. There is no restriction on mode of intervention e.g. Mass media or group discussions. There is no restriction on who provides the intervention e.g. researcher, community-based workers or insurance agent. There is no restriction on duration and frequency of providing intervention. The health insurance scheme could be of any type, including but not limited to, public, private, for profit and not-for-profit. Contribution for premiums</p> | <p>If answer to one of the components is “Yes” OR if it is not clearly stated and you are in doubt, then Include the study for full text screening</p> <p>If you are in doubt: flag for discussion</p> | <p>If no, Exclude the study</p> |
|-------------------------------------------------------------------------------------------------------------------------------------------------------------------------------------------------------------------------------------------------------------------------------------------------------------------------------------------------------------|------------------------------------------------------------------------------------------------------------------------------------------------------------------------------------------------------------------------------------------------------------------------------------------------------------------------------------------------------------------------------------------------------------------------------------------------------------------------------------------------------------------------------------------------------------------------------------------------------------------------------------------------------------------------------------------------------------------------------------------------------------------------|--------------------------------------------------------------------------------------------------------------------------------------------------------------------------------------------------------|---------------------------------|

|                                                                                                                                                                                                                                                                                                                                                             |                                                                                                                                                                                                                                                                                                                                                                                      |  |  |
|-------------------------------------------------------------------------------------------------------------------------------------------------------------------------------------------------------------------------------------------------------------------------------------------------------------------------------------------------------------|--------------------------------------------------------------------------------------------------------------------------------------------------------------------------------------------------------------------------------------------------------------------------------------------------------------------------------------------------------------------------------------|--|--|
| 1<br>2<br>3<br>4<br>5<br>6<br>7<br>8<br>9<br>10<br>11<br>12<br>13<br>14<br>15<br>16<br>17<br>18<br>19<br>20<br>21<br>22<br>23<br>24<br>25<br>26<br>27<br>28<br>29<br>30<br>31<br>32<br>33<br>34<br>35<br>36<br>37<br>38<br>39<br>40<br>41<br>42<br>43<br>44<br>45<br>46<br>47<br>48<br>49<br>50<br>51<br>52<br>53<br>54<br>55<br>56<br>57<br>58<br>59<br>60 | <p>could be made by individual, non-governmental organizations, employer or government. There is no restriction on focus of health insurance e.g. hospital stay or surgery.] OR</p> <p>Does the study describe about the factors associated with awareness of health insurance? OR Does the study describe awareness as a factor for uptake or re-enrolment of health insurance?</p> |  |  |
|-------------------------------------------------------------------------------------------------------------------------------------------------------------------------------------------------------------------------------------------------------------------------------------------------------------------------------------------------------------|--------------------------------------------------------------------------------------------------------------------------------------------------------------------------------------------------------------------------------------------------------------------------------------------------------------------------------------------------------------------------------------|--|--|

|   |                                                                                                                                                                                                                                                                                                                                                                        |                                                                                   |                                                                                                                                                                                                                                                                                          |
|---|------------------------------------------------------------------------------------------------------------------------------------------------------------------------------------------------------------------------------------------------------------------------------------------------------------------------------------------------------------------------|-----------------------------------------------------------------------------------|------------------------------------------------------------------------------------------------------------------------------------------------------------------------------------------------------------------------------------------------------------------------------------------|
| 2 | <b>Full text screening</b>                                                                                                                                                                                                                                                                                                                                             |                                                                                   |                                                                                                                                                                                                                                                                                          |
| E | Is it a study conducted in India?                                                                                                                                                                                                                                                                                                                                      | If it is “Yes”, Go to F                                                           | If no Exclude the study                                                                                                                                                                                                                                                                  |
| F | Did the study involve adult population?                                                                                                                                                                                                                                                                                                                                | If it is “Yes”, Go to G                                                           | If no Exclude the study                                                                                                                                                                                                                                                                  |
| G | Does the study involve one of the following design or analysis: RCTs, interrupted time series studies, difference-in-difference, regression discontinuity designs, statistical matching, quasi-randomized and non-randomized trials, prospective, retrospective, and analytical cross-sectional studies and studies related to process evaluation and policy analysis. | If answer is “Yes”<br>Go to H OR<br>If you are doubtful, then flag for discussion | If the study is descriptive cross-sectional (or prevalence study) having single group OR If the publication is a commentary, perspective, editorial, reviews, conference abstracts or policy paper that does not provide details of implementation of intervention:<br>Exclude the study |

|                                                                                                                                                                                                                                                                                                                                                             |                                                                                                                                                                                                                                                                                                                                                                                                                                                                                                                                                                                                                                                                                                                                                                        |                                                                                                                    |                                |
|-------------------------------------------------------------------------------------------------------------------------------------------------------------------------------------------------------------------------------------------------------------------------------------------------------------------------------------------------------------|------------------------------------------------------------------------------------------------------------------------------------------------------------------------------------------------------------------------------------------------------------------------------------------------------------------------------------------------------------------------------------------------------------------------------------------------------------------------------------------------------------------------------------------------------------------------------------------------------------------------------------------------------------------------------------------------------------------------------------------------------------------------|--------------------------------------------------------------------------------------------------------------------|--------------------------------|
| 1<br>2<br>3<br>4<br>5<br>6<br>7<br>8<br>9<br>10<br>11<br>12<br>13<br>14<br>15<br>16<br>17<br>18<br>19<br>20<br>21<br>22<br>23<br>24<br>25<br>26<br>27<br>28<br>29<br>30<br>31<br>32<br>33<br>34<br>35<br>36<br>37<br>38<br>39<br>40<br>41<br>42<br>43<br>44<br>45<br>46<br>47<br>48<br>49<br>50<br>51<br>52<br>53<br>54<br>55<br>56<br>57<br>58<br>59<br>60 | <p><b>H</b> Does the study describe the intervention for increasing awareness of and uptake of health insurance?</p> <p>[The intervention could be any intervention, policy or program (e.g. Behavioral change communication or educational) that directly or indirectly affects awareness of health insurance. There is no restriction on mode of intervention e.g. Mass media or group discussions. There is no restriction on who provides the intervention e.g. researcher, community-based workers or insurance agent. There is no restriction on duration and frequency of providing intervention. The health insurance scheme could be of any type, including but not limited to, public, private, for profit and not-for-profit. Contribution for premiums</p> | <p>If answer to one of the components is “Yes” Go to I OR</p> <p>If you are in doubt, then flag for discussion</p> | <p>If no Exclude the study</p> |
|-------------------------------------------------------------------------------------------------------------------------------------------------------------------------------------------------------------------------------------------------------------------------------------------------------------------------------------------------------------|------------------------------------------------------------------------------------------------------------------------------------------------------------------------------------------------------------------------------------------------------------------------------------------------------------------------------------------------------------------------------------------------------------------------------------------------------------------------------------------------------------------------------------------------------------------------------------------------------------------------------------------------------------------------------------------------------------------------------------------------------------------------|--------------------------------------------------------------------------------------------------------------------|--------------------------------|

|                                                                                                                                                                                                                                                                                                                                                             |                                                                                                                                                                                                                                                                                                                                                                                             |  |  |
|-------------------------------------------------------------------------------------------------------------------------------------------------------------------------------------------------------------------------------------------------------------------------------------------------------------------------------------------------------------|---------------------------------------------------------------------------------------------------------------------------------------------------------------------------------------------------------------------------------------------------------------------------------------------------------------------------------------------------------------------------------------------|--|--|
| 1<br>2<br>3<br>4<br>5<br>6<br>7<br>8<br>9<br>10<br>11<br>12<br>13<br>14<br>15<br>16<br>17<br>18<br>19<br>20<br>21<br>22<br>23<br>24<br>25<br>26<br>27<br>28<br>29<br>30<br>31<br>32<br>33<br>34<br>35<br>36<br>37<br>38<br>39<br>40<br>41<br>42<br>43<br>44<br>45<br>46<br>47<br>48<br>49<br>50<br>51<br>52<br>53<br>54<br>55<br>56<br>57<br>58<br>59<br>60 | <p>could be made by individual, non-governmental organizations, employer or government. There is no restriction on focus of health insurance e.g. hospital stay or surgery.] OR</p> <p>Does the study describe about the factors associated with awareness of health insurance?</p> <p>OR Does the study describe awareness as a factor for uptake or re-enrolment of health insurance?</p> |  |  |
|-------------------------------------------------------------------------------------------------------------------------------------------------------------------------------------------------------------------------------------------------------------------------------------------------------------------------------------------------------------|---------------------------------------------------------------------------------------------------------------------------------------------------------------------------------------------------------------------------------------------------------------------------------------------------------------------------------------------------------------------------------------------|--|--|

1  
2  
3  
4  
5  
6  
7  
8  
9  
10  
11  
12  
13  
14  
15  
16  
17  
18  
19  
20  
21  
22  
23  
24  
25  
26  
27  
28  
29  
30  
31  
32  
33  
34  
35  
36  
37  
38  
39  
40  
41  
42  
43  
44  
45  
46  
47  
48  
49  
50  
51  
52  
53  
54  
55  
56  
57  
58  
59  
60

|          |                                                     |                                                   |                          |
|----------|-----------------------------------------------------|---------------------------------------------------|--------------------------|
| <b>I</b> | Did the study measure the outcomes of our interest? | If answer is “Yes” then Include for data analysis | If no, Exclude the study |
|----------|-----------------------------------------------------|---------------------------------------------------|--------------------------|

For peer review only

*Data extraction:*

Data will be extracted independently by three reviewers (SSP, ER, BTV). A pre-designed data extraction form will be used for extraction of the data. The data extraction form will be subjected to pilot testing and will be revised as per the suggestions by the reviewers and the experts at this stage. Any disagreements during data extraction, will be resolved by consensus supported by the senior reviewer. Data will be extracted based on the characteristics mentioned in the table 3.

**Table 3: Data extraction format**

|                            |                                                                     |
|----------------------------|---------------------------------------------------------------------|
| Publication details        | First author's last name                                            |
|                            | Year of publication                                                 |
|                            | Publication type: Report/ journal publication                       |
| Population characteristics | Age                                                                 |
|                            | Gender                                                              |
|                            | Religion/ Race/ Ethnicity                                           |
|                            | Number of participants included                                     |
| Location/setting           | State/ district or other details of place where study was conducted |
|                            | Setting: hospital / community based                                 |
|                            | Rural/urban                                                         |

|                                                                                                          |                              |                                                                                                                                                                                                                                                                                                                                                                                  |
|----------------------------------------------------------------------------------------------------------|------------------------------|----------------------------------------------------------------------------------------------------------------------------------------------------------------------------------------------------------------------------------------------------------------------------------------------------------------------------------------------------------------------------------|
| 1<br>2<br>3<br>4<br>5<br>6<br>7<br>8<br>9                                                                | Study methodology/<br>design | Study design: RCT, quasi-randomized trial, case control study etc.<br><br>Type of analysis                                                                                                                                                                                                                                                                                       |
| 10<br>11<br>12<br>13<br>14<br>15<br>16<br>17<br>18<br>19<br>20                                           | Intervention details         | Type of intervention, mode of delivery, other details such as content/<br>frequency, who provided it etc.<br><br>Start time and duration of intervention<br><br>Details of comparison                                                                                                                                                                                            |
| 21<br>22<br>23<br>24<br>25<br>26<br>27<br>28<br>29<br>30<br>31<br>32<br>33<br>34<br>35<br>36             | Insurance details            | Public/ private/ community-based insurance<br><br>Start or launch date (month and year) of insurance<br><br>Type of plan e.g. individual, family, senior citizen, critical illness etc.<br><br>Benefits of health insurance e.g. Cashless facility, hospitalization, pre-<br>and post-hospitalization, medical check-up, maternity benefits,<br>childcare, critical illness etc. |
| 37<br>38<br>39                                                                                           | Exposure details             | List different factors or themes                                                                                                                                                                                                                                                                                                                                                 |
| 40<br>41<br>42<br>43<br>44<br>45<br>46<br>47<br>48<br>49<br>50<br>51<br>52<br>53<br>54<br>55<br>56<br>57 | Outcome details              | List down outcome, variable type: continuous or categorical, type of<br>analysis<br><br>Effect measures with 95% confidence interval (Such as Odds ratio, Risk<br>ratio, hazard ratio)<br><br>Number of participants analyzed, number loss to follow-up<br><br>Details of subgroup analysis, if any.                                                                             |
| 58<br>59<br>60                                                                                           | Other details                | Themes and sub-themes                                                                                                                                                                                                                                                                                                                                                            |



1  
2  
3  
4  
5  
6 *Critical appraisal of included studies:*  
7

8 Effective public health practice project (EPHPP) tool<sup>23</sup> will be used to assess the  
9 methodological quality of quantitative studies (except observational studies) and Newcastle-  
10 Ottawa scale (NOS)<sup>24</sup> will be used for the observational studies. The EPHPP rates the study as  
11 ‘strong’, ‘moderate’ or ‘weak’ based on eight domains. These domains are selection bias, study  
12 design, confounders, blinding, data collection methods, withdrawals and dropouts, intervention  
13 integrity and analysis.<sup>23</sup> NOS rates the study based on three domains viz. selection,  
14 comparability and outcome, and the final score ranges between 0 and 10.<sup>24</sup> Reviewers (BTV,  
15 ER and SSP), independently in pairs, will appraise the included studies. Any discrepancies  
16 between the decisions of reviewers will be resolved by discussion until consensus is achieved.  
17 If required, a senior reviewer will be involved as arbitrator and final decision maker to rate the  
18 study quality.  
19  
20  
21  
22  
23  
24  
25  
26  
27  
28  
29  
30  
31  
32  
33  
34

35 *Data Analysis:*  
36

37 Study characteristics consisting of population, intervention/exposure, comparator, outcome,  
38 study design components across studies will be tabulated, which will help us to compare and  
39 analyze. Subsequently, studies will be categorized into quantitative and qualitative and will be  
40 analyzed separately. This step will be followed by mixed methods synthesis as suggested by  
41 Panda et al. (2013).<sup>25</sup>  
42  
43  
44  
45  
46  
47  
48  
49

50 1. Quantitative studies:  
51

52 Studies will be grouped based on study design, and type of data available (continuous or  
53 categorical). If possible, similar studies will be pooled to perform meta-analysis using random  
54 effect model. If data are continuous, standardized mean difference will be calculated with 95%  
55 confidence interval. If data are categorical, odds ratio or risk ratio will be calculated and reported  
56  
57  
58  
59  
60

1  
2  
3 with 95% confidence interval. Meta-analysis will be visually represented with a forest plot. We  
4  
5 assume possibility of heterogeneity owing to differences in study design or analysis,  
6  
7 intervention, type of insurance and other contextual factors. If heterogeneity exists due to  
8  
9 aforementioned components, we will not perform meta-analysis. After ruling out clinical or  
10  
11 methodological heterogeneity, we will statistically measure heterogeneity by using  $I^2$  test. If  
12  
13 significant heterogeneity (>50%) persists for a particular outcome, meta-analysis will not be  
14  
15 conducted. In this case, our focus would be on conducting narrative synthesis and undertaking  
16  
17 a subgroup analysis. Key findings of the studies will be summarized in tables/ figures or vote  
18  
19 counting will be considered. Subgroups could be based on study design, intervention type,  
20  
21 insurance type (such as private and public), region and other contextual factors (e.g.,  
22  
23 urban/rural).

## 24 25 26 27 28 2. Qualitative synthesis:

29  
30 We will carry out thematic analysis as suggested by Thomas & Harden (2008).<sup>26</sup> An iterative  
31  
32 process of line-by-line coding will be undertaken as a first step, which will be followed by  
33  
34 categorizing the codes into code families. Subsequently, a code tree will be created, and themes  
35  
36 and sub-themes will be generated. Three reviewers (SSP, ER, BTV) will code the data  
37  
38 independently and resolve the discrepancies by discussion until consensus is achieved.  
39  
40

## 41 42 3. Mixed methods synthesis:

43  
44 The result from both, qualitative and quantitative synthesis will be merged for each outcome.  
45  
46 Parallel synthesis will be carried out, and the findings will be summarized narratively.<sup>25</sup> To  
47  
48 understand the influence of inequality in uptake of health insurance based on type of insurance,  
49  
50 we will explore the possibility of conducting subgroup analysis based on some of the  
51  
52 components of PROGRESS-Plus framework.<sup>27</sup>  
53  
54

55  
56  
57 *Grading the evidence:*  
58  
59  
60

1  
2  
3 We will use the GRADE approach to evaluate the certainty of evidence for each outcome.<sup>21</sup>

4  
5 Using GRADE profiler software, we will present the main findings of the systematic review in  
6  
7 a summary of findings table.  
8  
9

10  
11 *Patient and public involvement:*  
12

13 We did not involve patients or public while designing and writing this protocol.  
14  
15

16  
17 **Ethics and Dissemination:**  
18

19 This review will be based on published studies, therefore, an ethical clearance is not applicable.  
20

21 We have planned following activities to communicate and disseminate the findings of this  
22  
23 review. We plan to make at least one national or international conference presentation. We will  
24  
25 prepare policy brief to be shared with funder and to get a wider reader, we plan to submit the  
26  
27 manuscript to a peer-reviewed journal. Upon journal publication, we intend to circulate the  
28  
29 findings through our social media platform and website.  
30  
31

32  
33  
34 **Author contribution:**  
35

36 Dr Reshmi B is the guarantor of the review. RB, SSP, ER, and BTV conceptualized the  
37  
38 manuscript. SSP drafted the first manuscript, which was further edited by ER. RV developed  
39  
40 the search strategy. All the authors (RB, UB, SSP, ER, RV and BTV) read, edited, provided  
41  
42 feedback and approved the final manuscript.  
43  
44  
45

46  
47 **Funding statement:**  
48

49 This work was supported by PHRI-RESEARCH grants awarded by PHFI with the financial  
50  
51 support of Department of Science and Technology (DST). We appreciate the technical support  
52  
53 provided by public Health Evidence South Asia, Prasanna School of Public Health, Manipal  
54  
55 Academy of Higher Education, Manipal. Funder did not have any role in writing this protocol  
56  
57 and decision to submit it for publication.  
58  
59  
60

1  
2  
3 **Competing interest:** Authors do not have any competing interest.  
4  
5

6 **Acknowledgement:** We are grateful to Dr. Prachi Pundir, Research Officer, public Health  
7  
8 Evidence South Asia, Prasanna School of Public Health, Manipal Academy of Higher  
9  
10 Education, Manipal, for proof reading the final document.  
11  
12  
13

14 **References:**

- 15  
16  
17 1. Basaza R, Kyasiimire EP, Namyalo PK, et al. Willingness to pay for Community Health  
18  
19 Insurance among taxi drivers in Kampala City, Uganda: a contingent evaluation. *Risk*  
20  
21 *Manag Healthc Policy* 2019;12:133-43. doi: 10.2147/RMHP.S184872  
22  
23  
24 2. Mirach TH, Demissie GD, Biks GA. Determinants of community-based health insurance  
25  
26 implementation in west Gojjam zone, Northwest Ethiopia: a community based cross  
27  
28 sectional study design. *BMC Health Services Research* 2019;19(1):544. doi:  
29  
30 10.1186/s12913-019-4363-z  
31  
32  
33 3. Myint CY, Pavlova M, Groot W. Health insurance in Myanmar: Knowledge, perceptions,  
34  
35 and preferences of Social Security Scheme members and general adult population. *The*  
36  
37 *International journal of health planning and management* 2019;34(1):346-69. doi:  
38  
39 10.1002/hpm.2643  
40  
41  
42 4. Ogundeji YK, Akomolafe B, Ohiri K, et al. Factors influencing willingness and ability to  
43  
44 pay for social health insurance in Nigeria. *PLoS One* 2019;14(8):e0220558-e58. doi:  
45  
46 10.1371/journal.pone.0220558  
47  
48  
49 5. Surendar R AM, Madhumadhi S, Saravanan R, Karrunya S, Srikanth S. Awareness on Health  
50  
51 Insurance among a selected Urban Population in Puducherry. *Nat J Res Community*  
52  
53 *Med* 2019;8(2):176-79.  
54  
55  
56  
57  
58  
59  
60

- 1  
2  
3 6. Okoroh J, Essoun S, Seddoh A, et al. Evaluating the impact of the national health insurance  
4  
5 scheme of Ghana on out of pocket expenditures: a systematic review. *BMC Health Serv*  
6  
7 *Res* 2018;18(1):426. doi: 10.1186/s12913-018-3249-9  
8  
9
- 10 7. Kuwawenaruwa A, Ramsey K, Binyaruka P, et al. Implementation and effectiveness of free  
11  
12 health insurance for the poor pregnant women in Tanzania: A mixed methods  
13  
14 evaluation. *Social Science & Medicine* 2019;225:17-25. doi:  
15  
16 <https://doi.org/10.1016/j.socscimed.2019.02.005>  
17  
18
- 19 8. van Hees SGM, O'Fallon T, Hofker M, et al. Leaving no one behind? Social inclusion of  
20  
21 health insurance in low- and middle-income countries: a systematic review.  
22  
23 *International Journal for Equity in Health* 2019;18(1):134. doi: 10.1186/s12939-019-  
24  
25 1040-0  
26  
27
- 28 9. Kanmiki EW, Bawah AA, Akazili J, et al. Unawareness of health insurance expiration status  
29  
30 among women of reproductive age in Northern Ghana: implications for achieving  
31  
32 universal health coverage. *Journal of Health, Population and Nutrition* 2019;38(1):34.  
33  
34 doi: 10.1186/s41043-019-0190-4  
35  
36
- 37 10. Fadlallah R, El-Jardali F, Hemadi N, et al. Barriers and facilitators to implementation,  
38  
39 uptake and sustainability of community-based health insurance schemes in low- and  
40  
41 middle-income countries: a systematic review. *International journal for equity in*  
42  
43 *health* 2018;17(1):13-13. doi: 10.1186/s12939-018-0721-4  
44  
45  
46
- 47 11. Maurya D, Mintrom M. Policy entrepreneurs as catalysts of broad system change: the case  
48  
49 of social health insurance adoption in India. *Journal of Asian Public Policy*  
50  
51 2020;13(1):18-34. doi: 10.1080/17516234.2019.1617955  
52  
53
- 54 12. Lagomarsino G, Garabrant A, Adyas A, et al. Moving towards universal health coverage:  
55  
56 health insurance reforms in nine developing countries in Africa and Asia. *The Lancet*  
57  
58 2012;380(9845):933-43. doi: 10.1016/S0140-6736(12)61147-7  
59  
60

- 1  
2  
3 13. Garg S, Bebarta KK, Tripathi N. Performance of India's national publicly funded health  
4 insurance scheme, Pradhan Mantri Jan Arogya Yojana (PMJAY), in improving access  
5 and financial protection for hospital care: findings from household surveys in  
6 Chhattisgarh state. *BMC Public Health* 2020;20(1):949. doi: 10.1186/s12889-020-  
7 09107-4  
8  
9  
10  
11  
12  
13
- 14 14. Key Indicators of Social Consumption in India Health: Government of India, Ministry of  
15 Statistics and Programme Implementation, 2014.  
16  
17
- 18 15. Abiola AO, Ladi-Akinyemi TW, Oyeleye OA, et al. Knowledge and utilisation of National  
19 Health Insurance Scheme among adult patients attending a tertiary health facility in  
20 Lagos State, South-Western Nigeria. *Afr J Prim Health Care Fam Med* 2019;11(1):e1-  
21 e7. doi: 10.4102/phcfm.v11i1.2018  
22  
23  
24  
25  
26  
27
- 28 16. Seddoh A, Sataru F. Mundane? Demographic characteristics as predictors of enrolment  
29 onto the National Health Insurance Scheme in two districts of Ghana. *BMC Health  
30 Services Research* 2018;18(1):330. doi: 10.1186/s12913-018-3155-1  
31  
32  
33  
34
- 35 17. Michael GC, Aliyu I, Grema BA, et al. Perception of Factors Influencing Primary Health-  
36 Care Facility Choice Among National Health Insurance Enrollees of a Northwest  
37 Nigerian Hospital. *J Patient Exp* 2019;6(3):247-52. doi: 10.1177/2374373518790072  
38  
39  
40  
41
- 42 18. Ayanore MA, Pavlova M, Kugbey N, et al. Health insurance coverage, type of payment for  
43 health insurance, and reasons for not being insured under the National Health Insurance  
44 Scheme in Ghana. *Health Economics Review* 2019;9(1):39. doi: 10.1186/s13561-019-  
45 0255-5  
46  
47  
48  
49
- 50 19. Ghaddar S, Byun J, Krishnaswami J. Health insurance literacy and awareness of the  
51 Affordable Care Act in a vulnerable Hispanic population. *Patient education and  
52 counseling* 2018;101(12):2233-40. doi: 10.1016/j.pec.2018.08.033  
53  
54  
55  
56  
57  
58  
59  
60

- 1  
2  
3  
4  
5  
6  
7  
8  
9  
10  
11  
12  
13  
14  
15  
16  
17  
18  
19  
20  
21  
22  
23  
24  
25  
26  
27  
28  
29  
30  
31  
32  
33  
34  
35  
36  
37  
38  
39  
40  
41  
42  
43  
44  
45  
46  
47  
48  
49  
50  
51  
52  
53  
54  
55  
56  
57  
58  
59  
60
20. Prinja S, Chauhan AS, Karan A, et al. Impact of Publicly Financed Health Insurance Schemes on Healthcare Utilization and Financial Risk Protection in India: A Systematic Review. *PLoS One* 2017;12(2):e0170996-e96. doi: 10.1371/journal.pone.0170996
  21. Cochrane Handbook for Systematic Reviews of Interventions version 6.1 (updated September 2020). In: Higgins JPT, Thomas J, Chandler J, et al., eds.: Cochrane, 2020.
  22. Moher D, Liberati A, Tetzlaff J, et al. Preferred reporting items for systematic reviews and meta-analyses: the PRISMA statement. *PLoS medicine* 2009;6(7):e1000097. doi: 10.1371/journal.pmed.1000097
  23. Quality Assessment Tool For Quantitative Studies Hamilton, ON: Effective Public Health Practice Project; 1998 [Available from: <https://www.nccmt.ca/knowledge-repositories/search/14> accessed December 10 2020.
  24. Wells GA, Shea B, O'Connell D, et al. The Newcastle-Ottawa Scale (NOS) for assessing the quality of nonrandomised studies in meta-analyses: Ottawa Hospital Research Institute; 2019 [Available from: [http://www.ohri.ca/programs/clinical\\_epidemiology/oxford.asp](http://www.ohri.ca/programs/clinical_epidemiology/oxford.asp) accessed December 12 2020.
  25. Panda P, Dror I, Koehlmoos T, et al. What factors affect take up of voluntary and community based health insurance programmes in low- and middle- income countries? A systematic review (Protocol). London: EPPI-Centre, Social Science Research Unit, Institute of Education, University of London, 2013.
  26. Thomas J, Harden A. Methods for the thematic synthesis of qualitative research in systematic reviews. *BMC Medical Research Methodology* 2008;8(1):45. doi: 10.1186/1471-2288-8-45

- 1  
2  
3 27. Oliver S, Kavanagh J, Caird J, et al. Health promotion, inequalities and young people's  
4 health. A systematic review of research. London: EPPI-Centre, Social Science  
5 Research Unit, Institute of Education, University of London, 2008.  
6  
7  
8  
9  
10  
11  
12  
13  
14  
15  
16  
17  
18  
19  
20  
21  
22  
23  
24  
25  
26  
27  
28  
29  
30  
31  
32  
33  
34  
35  
36  
37  
38  
39  
40  
41  
42  
43  
44  
45  
46  
47  
48  
49  
50  
51  
52  
53  
54  
55  
56  
57  
58  
59  
60

For peer review only



**PRISMA-P (Preferred Reporting Items for Systematic review and Meta-Analysis Protocols) 2015 checklist: recommended items to address in a systematic review protocol\***

| Section and topic                 | Item No | Checklist item                                                                                                                                                                                  | Response (Yes or No) | Page number |
|-----------------------------------|---------|-------------------------------------------------------------------------------------------------------------------------------------------------------------------------------------------------|----------------------|-------------|
| <b>ADMINISTRATIVE INFORMATION</b> |         |                                                                                                                                                                                                 |                      |             |
| Title:                            |         |                                                                                                                                                                                                 |                      |             |
| Identification                    | 1a      | Identify the report as a protocol of a systematic review                                                                                                                                        | Yes                  | 1           |
| Update                            | 1b      | If the protocol is for an update of a previous systematic review, identify as such                                                                                                              | Not applicable (NA)  |             |
| Registration                      | 2       | If registered, provide the name of the registry (such as PROSPERO) and registration number                                                                                                      | No                   |             |
| Authors:                          |         |                                                                                                                                                                                                 |                      |             |
| Contact                           | 3a      | Provide name, institutional affiliation, e-mail address of all protocol authors; provide physical mailing address of corresponding author                                                       | Yes                  | 1           |
| Contributions                     | 3b      | Describe contributions of protocol authors and identify the guarantor of the review                                                                                                             | Yes                  | 22          |
| Amendments                        | 4       | If the protocol represents an amendment of a previously completed or published protocol, identify as such and list changes; otherwise, state plan for documenting important protocol amendments | NA                   |             |
| Support:                          |         |                                                                                                                                                                                                 |                      |             |
| Sources                           | 5a      | Indicate sources of financial or other support for the review                                                                                                                                   | Yes                  | 22          |
| Sponsor                           | 5b      | Provide name for the review funder and/or sponsor                                                                                                                                               | Yes                  | 22          |

|    |                           |     |                                                                                                                                                                                                                               |     |                   |
|----|---------------------------|-----|-------------------------------------------------------------------------------------------------------------------------------------------------------------------------------------------------------------------------------|-----|-------------------|
| 1  | Role of sponsor or funder | 5c  | Describe roles of funder(s), sponsor(s), and/or institution(s), if any, in developing the protocol                                                                                                                            | Yes | 22                |
| 2  | <b>INTRODUCTION</b>       |     |                                                                                                                                                                                                                               |     |                   |
| 3  | Rationale                 | 6   | Describe the rationale for the review in the context of what is already known                                                                                                                                                 | Yes | 8                 |
| 4  | Objectives                | 7   | Provide an explicit statement of the question(s) the review will address with reference to participants, interventions, comparators, and outcomes (PICO)                                                                      | Yes | 8, 9              |
| 5  | <b>METHODS</b>            |     |                                                                                                                                                                                                                               |     |                   |
| 6  | Eligibility criteria      | 8   | Specify the study characteristics (such as PICO, study design, setting, time frame) and report characteristics (such as years considered, language, publication status) to be used as criteria for eligibility for the review | Yes | 9-10              |
| 7  | Information sources       | 9   | Describe all intended information sources (such as electronic databases, contact with study authors, trial registers or other grey literature sources) with planned dates of coverage                                         | Yes | 11                |
| 8  | Search strategy           | 10  | Present draft of search strategy to be used for at least one electronic database, including planned limits, such that it could be repeated                                                                                    | Yes | 11, & table 1     |
| 9  | Study records:            |     |                                                                                                                                                                                                                               |     |                   |
| 10 | Data management           | 11a | Describe the mechanism(s) that will be used to manage records and data throughout the review                                                                                                                                  | Yes | 12                |
| 11 | Selection process         | 11b | State the process that will be used for selecting studies (such as two independent reviewers) through each phase of the review (that is, screening, eligibility and inclusion in meta-analysis)                               | Yes | 12, 13, & table 2 |

|                                    |     |                                                                                                                                                                                                                                                  |     |               |
|------------------------------------|-----|--------------------------------------------------------------------------------------------------------------------------------------------------------------------------------------------------------------------------------------------------|-----|---------------|
| Data collection process            | 11c | Describe planned method of extracting data from reports (such as piloting forms, done independently, in duplicate), any processes for obtaining and confirming data from investigators                                                           | Yes | 18            |
| Data items                         | 12  | List and define all variables for which data will be sought (such as PICO items, funding sources), any pre-planned data assumptions and simplifications                                                                                          | Yes | 18, & table 3 |
| Outcomes and prioritization        | 13  | List and define all outcomes for which data will be sought, including prioritization of main and additional outcomes, with rationale                                                                                                             | Yes | 10            |
| Risk of bias in individual studies | 14  | Describe anticipated methods for assessing risk of bias of individual studies, including whether this will be done at the outcome or study level, or both; state how this information will be used in data synthesis                             | Yes | 19, 20        |
| Data synthesis                     | 15a | Describe criteria under which study data will be quantitatively synthesised                                                                                                                                                                      | Yes | 20, 21        |
|                                    | 15b | If data are appropriate for quantitative synthesis, describe planned summary measures, methods of handling data and methods of combining data from studies, including any planned exploration of consistency (such as $I^2$ , Kendall's $\tau$ ) | Yes | 20, 21        |
|                                    | 15c | Describe any proposed additional analyses (such as sensitivity or subgroup analyses, meta-regression)                                                                                                                                            | Yes | 21            |
|                                    | 15d | If quantitative synthesis is not appropriate, describe the type of summary planned                                                                                                                                                               | Yes | 21            |
| Meta-bias(es)                      | 16  | Specify any planned assessment of meta-bias(es) (such as publication bias across studies, selective reporting within studies)                                                                                                                    | No  |               |
| Confidence in cumulative evidence  | 17  | Describe how the strength of the body of evidence will be assessed (such as GRADE)                                                                                                                                                               | Yes | 21            |

**\* It is strongly recommended that this checklist be read in conjunction with the PRISMA-P Explanation and Elaboration (cite when available) for important clarification on the items. Amendments to a review protocol should be tracked and dated. The copyright for PRISMA-P (including checklist) is held by the PRISMA-P Group and is distributed under a Creative Commons Attribution Licence 4.0.**

1  
2  
3  
4  
5  
6  
7  
8  
9  
10  
11  
12  
13  
14  
15  
16  
17  
18  
19  
20  
21  
22  
23  
24  
25  
26  
27  
28  
29  
30  
31  
32  
33  
34  
35  
36  
37  
38  
39  
40  
41  
42  
43  
44  
45  
46

*From: Shamseer L, Moher D, Clarke M, Ghersi D, Liberati A, Petticrew M, Shekelle P, Stewart L, PRISMA-P Group. Preferred reporting items for systematic review and meta-analysis protocols (PRISMA-P) 2015: elaboration and explanation. BMJ. 2015 Jan 2;349(jan02 1):g7647.*

For peer review only
